# Supplementary material for: Changes in arterial stiffness indices during a single haemodialysis session in end-stage renal disease population: a systematic review and meta-analysis protocol
Source: PubMed Central journal article supplement — BMJ Open. 2021 Sep 2;11(9):e045912. doi: 10.1136/bmjopen-2020-045912 (PMC8413866; doi:10.1136/bmjopen-2020-045912), 2021-09-02
Supplement: bmjopen-2020-045912.draft_revisions.pdf [file bmjopen-2020-045912.draft_revisions.pdf]

# BMJ Open

BMJ Open is committed to open peer review. As part of this commitment we make the peer review history of every article we publish publicly available.

When an article is published we post the peer reviewers' comments and the authors' responses online. We also post the versions of the paper that were used during peer review. These are the versions that the peer review comments apply to.

The versions of the paper that follow are the versions that were submitted during the peer review process. They are not the versions of record or the final published versions. They should not be cited or distributed as the published version of this manuscript.

BMJ Open is an open access journal and the full, final, typeset and author-corrected version of record of the manuscript is available on our site with no access controls, subscription charges or pay-per-view fees (<http://bmjopen.bmj.com>).

If you have any questions on BMJ Open's open peer review process please email [info.bmjopen@bmj.com](mailto:info.bmjopen@bmj.com)

# BMJ Open

## Changes in arterial stiffness indices during a single hemodialysis session in end-stage renal disease population -- A systematic review and meta-analysis protocol

|                               |                                                                                                                                                                                                                                                                                                                                                                                                                                                                                                                                                                                                                                                                                                                                                                                                                                                                                                                                                                           |
|-------------------------------|---------------------------------------------------------------------------------------------------------------------------------------------------------------------------------------------------------------------------------------------------------------------------------------------------------------------------------------------------------------------------------------------------------------------------------------------------------------------------------------------------------------------------------------------------------------------------------------------------------------------------------------------------------------------------------------------------------------------------------------------------------------------------------------------------------------------------------------------------------------------------------------------------------------------------------------------------------------------------|
| Journal:                      | <i>BMJ Open</i>                                                                                                                                                                                                                                                                                                                                                                                                                                                                                                                                                                                                                                                                                                                                                                                                                                                                                                                                                           |
| Manuscript ID                 | bmjopen-2020-045912                                                                                                                                                                                                                                                                                                                                                                                                                                                                                                                                                                                                                                                                                                                                                                                                                                                                                                                                                       |
| Article Type:                 | Protocol                                                                                                                                                                                                                                                                                                                                                                                                                                                                                                                                                                                                                                                                                                                                                                                                                                                                                                                                                                  |
| Date Submitted by the Author: | 20-Oct-2020                                                                                                                                                                                                                                                                                                                                                                                                                                                                                                                                                                                                                                                                                                                                                                                                                                                                                                                                                               |
| Complete List of Authors:     | Fortier, Catherine; INSERM U970, Paris Cardiovascular Research Center (PARCC), Team 7; CHU de Québec-Université Laval, Research Center-L'Hôtel-Dieu de Québec, Division of Nephrology<br>Obeid, Hasan; CHU de Québec-Université Laval, Research Center-L'Hôtel-Dieu de Québec, Division of Nephrology<br>Paré, Mathilde; CHU de Québec-Université Laval, Research Center-L'Hôtel-Dieu de Québec, Division of Nephrology<br>Garneau, Charles-Antoine; CHU de Québec-Université Laval, Research Center-L'Hôtel-Dieu de Québec, Division of Nephrology<br>Sidibé, Aboubacar; CHU de Québec-Université Laval, Research Center-L'Hôtel-Dieu de Québec, Division of Nephrology<br>Boutouyrie, Pierre; INSERM U970, Paris Cardiovascular Research Center (PARCC), Team 7; APHP, , Pharmacology Unit, Hôpital Européen Georges Pompidou, Université de Paris<br>Agharazii, Mohsen; CHU de Québec-Université Laval, Research Center-L'Hôtel-Dieu de Québec, Division of Nephrology |
| Keywords:                     | Dialysis < NEPHROLOGY, End stage renal failure < NEPHROLOGY, Hypertension < CARDIOLOGY, CLINICAL PHYSIOLOGY                                                                                                                                                                                                                                                                                                                                                                                                                                                                                                                                                                                                                                                                                                                                                                                                                                                               |
|                               |                                                                                                                                                                                                                                                                                                                                                                                                                                                                                                                                                                                                                                                                                                                                                                                                                                                                                                                                                                           |

SCHOLARONE™  
Manuscripts

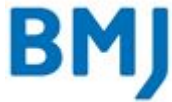

I, the Submitting Author has the right to grant and does grant on behalf of all authors of the Work (as defined in the below author licence), an exclusive licence and/or a non-exclusive licence for contributions from authors who are: i) UK Crown employees; ii) where BMJ has agreed a CC-BY licence shall apply, and/or iii) in accordance with the terms applicable for US Federal Government officers or employees acting as part of their official duties; on a worldwide, perpetual, irrevocable, royalty-free basis to BMJ Publishing Group Ltd ("BMJ") its licensees and where the relevant Journal is co-owned by BMJ to the co-owners of the Journal, to publish the Work in this journal and any other BMJ products and to exploit all rights, as set out in our [licence](#).

The Submitting Author accepts and understands that any supply made under these terms is made by BMJ to the Submitting Author unless you are acting as an employee on behalf of your employer or a postgraduate student of an affiliated institution which is paying any applicable article publishing charge ("APC") for Open Access articles. Where the Submitting Author wishes to make the Work available on an Open Access basis (and intends to pay the relevant APC), the terms of reuse of such Open Access shall be governed by a Creative Commons licence – details of these licences and which [Creative Commons](#) licence will apply to this Work are set out in our licence referred to above.

Other than as permitted in any relevant BMJ Author's Self Archiving Policies, I confirm this Work has not been accepted for publication elsewhere, is not being considered for publication elsewhere and does not duplicate material already published. I confirm all authors consent to publication of this Work and authorise the granting of this licence.

1  
2  
3 **Changes in arterial stiffness indices during a single hemodialysis session in end-stage renal**  
4 **disease population -- A systematic review and meta-analysis protocol**  
5  
6  
7

8 Authors: Catherine FORTIER<sup>1</sup>, Hasan OBEID<sup>2</sup>, Mathilde PARÉ<sup>2</sup>, Charles-Antoine GARNEAU<sup>2</sup>,  
9 Aboubacar SIDIBÉ<sup>2</sup>, Pierre BOUTOUYRIE<sup>1,3</sup>, Mohsen AGHARAZII<sup>2</sup>.  
10  
11

12  
13 <sup>1</sup> INSERM U-970, Paris Cardiovascular Research Center (PARCC), Cellular molecular and  
14 physiological mechanisms of heart failure (Team 7), Paris, France.  
15

16 <sup>2</sup> CHU de Québec-Université Laval Research Center-L'Hôtel-Dieu de Québec, Division of  
17 Nephrology, Québec, Québec, Canada.  
18

19 <sup>3</sup> AP-HP, Pharmacology Unit, Hôpital Européen Georges Pompidou, Université de Paris, Paris,  
20 France.  
21  
22

23  
24 catherine.fortier@inserm.fr  
25

26 hasan.obeid@crchudequebec.ulaval.ca  
27

28 mathilde.pare.1@ulaval.ca  
29

30 charles-antoine.garneau.2@ulaval.ca  
31

32 aboubacar.sidibe.1@ulaval.ca  
33

34 pierre.boutouyrie@aphp.fr  
35  
36

37  
38 **Word Count:** 2 498 words  
39  
40

41  
42 **Corresponding author:**

43 Mohsen Agharazii, MD

44 CHU de Québec-Université Laval

45 Research Center-L'Hôtel-Dieu de Québec

46 Division of Nephrology  
47

48 11, Côte du Palais,

49 Québec, Québec, Canada

50 G1R 2J6

51 Tél: 418-691-5464

52 Fax: 418-691-5562

53 [mohsen.agharazii@crhdq.ulaval.ca](mailto:mohsen.agharazii@crhdq.ulaval.ca)  
54  
55  
56  
57  
58  
59  
60

## ABSTRACT

**Introduction:** End-stage renal disease patients are at higher risk of cardiovascular morbidity and mortality, a risk mediated in part by increased aortic stiffness. Arterial stiffness is assessed at different anatomical locations (central elastic or peripheral muscular arteries) using a variety of mechanical biomarkers. However, little is known on the robustness of each of these mechanical biomarkers following a hemodynamic stress caused by a single hemodialysis session.

**Methods and analysis:** A systematic review has been designed and reported in accordance with the Preferred Reporting Items for Systematic review and Meta-Analysis Protocols. A targeted search strategy applicable in key databases (PubMed, Embase, the Cochrane Library, Web of Science and grey literature) is constructed to search articles and reviews from inception to October 16<sup>th</sup> 2020. Only articles of studies conducted with adults under chronic hemodialysis for kidney failure, with repeated measures of arterial stiffness metrics (pulse wave velocity, augmentation index, arterial distensibility or stiffness) following a before-and-after design surrounding a hemodialysis session will be selected. The screening process, data extraction and assessment of risk bias (ROBINS-I tool) will be done by two independent pairs of reviewers. Meta-analysis will enable adjustments for potential confounders and subgroup analyses will be performed to discriminate changes in arterial stiffness metrics from elastic, muscular or global arterial territories.

**Ethics and dissemination:** This study does not require ethical approval. Findings will be submitted for publication to relevant peer-reviewed journals and will be presented at profession-specific conferences.

**Prospero registration number:** Under Prospero editorial review for acceptance since October 12, 2020.

1  
2  
3 **Keywords:** hemodialysis, end-stage renal disease, arterial stiffness, pulse wave velocity, PWV,  
4 pulse wave analysis, augmentation index, central pulse pressure, distensibility, arterial compliance.  
5  
6  
7  
8  
9  
10

## 11 **ARTICLE SUMMARY**

### 12 **Strengths and limitations**

- 13  
14  
15  
16  
17 • Selection of before-and-after design studies will enable a better comprehension of the effect  
18 of hemodynamic stress that occurs during hemodialysis session on arterial mechanical  
19 properties.  
20  
21
- 22  
23  
24 • Subgroup analysis according to site of blood vessels (central elastic vs. peripheral  
25 muscular) is a relevant approach to explain discrepancies of arterial stiffness changes during  
26 hemodialysis, as large elastic and medium-sized muscular arteries may behave differently  
27 during excess liquid removal and sympathetic activation.  
28  
29
- 30  
31  
32 • Meta-regression will help assessing the extent of the impact of potential clinical and  
33 hemodynamic confounders on the different arterial stiffness indices during a hemodialysis  
34 session  
35  
36
- 37  
38  
39 • Implementing well-validated scales for the assessment of risk of bias and certainty of  
40 evidence will minimize misinterpretation.  
41  
42
- 43  
44  
45 • Potential diversity and heterogeneity of arterial stiffness markers may limit quantitative  
46 analyses.  
47  
48  
49  
50  
51  
52  
53  
54  
55  
56  
57  
58  
59  
60

## INTRODUCTION

Hemodialysis (HD) is the most common treatment for patients with end-stage renal disease (ESRD). Its intermittent regimen, usually thrice weekly, leads to inexorable retention of solutes, toxins, and excess volume during the interdialytic period (2-3 days), which are partially corrected during the subsequent HD (i.e. usually 4 hours). Despite its vital role, HD is not a physiological treatment. A high ultrafiltration rate during this short period reduces intravascular blood volume leading to a decrease in blood pressure and coronary flow, hypoperfusion of vital vascular beds, and reflex activation of sympathetic nervous system which causes tachycardia [1]. Moreover, during HD, the dialysis membrane is a site where blood has substantial contact with non-biological material, activating white blood cells and their downstream biological reactions which involve activation of complement alternative pathway [2]. In addition, electrolyte composition of dialysis solution may alter cardiovascular response through the acute changes in serum calcium and magnesium concentrations [3].

Patients with chronic kidney disease are at increased risk of aortic stiffness through various biological processes [4]. Aortic stiffness is a non-traditional mechanical biomarker of cardiovascular morbidity and mortality [5], which increases cardiac workload and pulse pressure transmission along the arterial tree. Classically, aortic stiffness is evaluated non-invasively by measuring or estimating carotid-femoral pulse wave velocity (PWV). Other methods aim to quantify the hemodynamic consequences of aortic stiffness through analysis of aortic pulse pressure waveform morphology and determination of central augmentation index (AIx) as a measure of pressure wave reflection [6]. There are also other systems that use heart-ankle PWV or brachial-ankle PWV which incorporates not only the stiffness of aorta (central elastic vessel), but also the stiffness of medium-sized muscular vessels [7]. It is also possible to study local arterial

1  
2  
3 stiffness [8], for example, by studying pressure-diameter relationship throughout the cardiac cycle  
4  
5 for arteries such as the common carotid artery (elastic) or radial artery (muscular). Due to the  
6  
7 heterogeneity of the arterial wall composition and dimension, various vascular segments behave  
8  
9 differently in response to pathological conditions, volume status, blood pressure, heart rate and  
10  
11 sympathetic activity. To what extent a single session of HD affects these measurements is not only  
12  
13 important scientifically, but also clinically. Indeed, if the timing of measurement, with respect to  
14  
15 HD, is important, it could have a significant impact on the predictive value of these mechanical  
16  
17 biomarkers. Furthermore, because of the heterogeneity of the arterial tree and the various methods  
18  
19 used to estimate vascular stiffness, conclusions drawn from different observations may vary  
20  
21 according to site of measurement and methodology. Finally, studies addressing this question are  
22  
23 scarce, and usually include a small number of subjects, which could hamper the reliability of their  
24  
25 conclusions. Therefore, we propose to conduct a systematic review and a meta-analysis to estimate  
26  
27 the impact of a single session of HD on markers of arterial stiffness in an attempt to recommend  
28  
29 the best timing of measurement with respect to HD. If possible, we will examine whether all  
30  
31 vascular segments and markers of arterial stiffness point towards the same conclusion. Whilst  
32  
33 pursuing these goals, this review will highlight the strengths and weaknesses of the reported  
34  
35 studies, and determine if there is a need for further well-designed investigations.  
36  
37  
38  
39  
40  
41  
42  
43  
44  
45

## 46 **Objectives**

47  
48 The major objective of this review is to determine the acute effect of a single HD session on  
49  
50 mechanical biomarkers of arterial stiffness including: carotid-femoral PWV, carotid-radial PWV,  
51  
52 brachial-ankle PWV, femoral-tibial PWV, aortic pulse wave analysis, central pulse wave analysis  
53  
54  
55  
56  
57



(augmentation index and central pulse pressure), aortic/carotid/femoral/radial distension metrics, compliance or incremental elastic modulus.

## **METHODS**

### **Design**

We will conduct this systematic review and meta-analysis in accordance with this predefined protocol which is reported in line with the Preferred Reporting Items for Systematic Reviews and Meta Analyses Protocols (PRISMA-P) checklist [9, 10].

### **Population and eligibility criteria**

In this review, we will include all studies conducted amongst adult patients ( $\geq 18$  years old) with ESRD undergoing chronic HD, either in hospital setting or at home.

### **Intervention**

In this review, a single HD session will be considered as the main intervention.

### **Outcomes**

The primary outcome will be the change in arterial stiffness using PWV-based measurements. Pulse wave velocity is the most widely accepted and used method to measure arterial stiffness by determination of pulse transit time between two points over an arterial segment (m/s). Arterial segments may include central large elastic and peripheral muscular arteries in different proportions such as carotid-femoral PWV, estimated aortic PWV, brachial-ankle PWV, carotid-radial PWV, femoral-distal PWV.

1  
2  
3  
4  
5  
6  
7  
8  
9  
10  
11  
12  
13  
14  
15  
16  
17  
18  
19  
20  
21  
22  
23  
24  
25  
26  
27  
28  
29  
30  
31  
32  
33  
34  
35  
36  
37  
38  
39  
40  
41  
42  
43  
44  
45  
46  
47  
48  
49  
50  
51  
52  
53  
54  
55  
56  
57  
58  
59  
60

Secondary outcomes will be based on biomarkers of arterial stiffness such central pulse pressure, central augmentation index, arterial distensibility, compliance and incremental elastic modulus of aorta, carotid, femoral and radial arteries. We will report absolute values as well as between-group mean differences in their respective units of measurement per biomarker.

### Study design

We will include all observational studies with repeated measures of arterial stiffness or central pressure with a before-and-after design surrounding a HD session. In the case of interventional studies, the values of the reference group (standard care) will be used in the analysis. We will exclude non-human studies, narrative reviews, in-vitro or mathematical modeling reports. Duplicate or sub-study of previously published investigations will be removed.

### Search Strategy

Our search strategy includes bibliographic databases (PubMed, Embase, The Cochrane Library and Web of Science), references lists of eligible studies and review articles, trials registers and grey literature from inception to October 16<sup>th</sup> 2020. MeSH terms will be used to target articles relevant to the research question. Our proposed literature search strategy is outlined in *Appendix 1*. Manual screening of the reference list will be conducted based on pre-defined criteria listed in *Table 1*. No language restrictions or publication period will be imposed on the initial searches; however, our final analysis will be limited to articles originally reported in English, French, Italian and Spanish. Searches will be re-run just before the final analyses and any further identified studies will be retrieved for inclusion. Unpublished studies will not be sought. Duplicate citations will be removed.

## Study screening and exclusions

An iterative process of study selection will be conducted using the inclusion and exclusion criteria detailed in *Table 1*. The study selection will be done by 2 pairs of independent reviewers, each pair screening half of the records. In case of a disagreement between individual judgment, a third reviewer will decide. Decisions will be recorded in an Excel spreadsheet. First, citations will be screened by title and abstract. After this first round of selection, materials and methods sections of the selected articles will be screened to confirm the appropriateness of the study design and of the arterial stiffness assessment method relative to the review question. Before data extraction, another round of selection will be performed by both reviewers at the full-text level.

## Data extraction

A data extraction form will be prepared a-priori with consensus amongst the investigators. Extracted data will include: a) ***Study characteristics, design and methods***: title, first and last author, journal and year of publication, research team or country where research was based, language of publication, sources of funding, study design, , inclusion and exclusion criteria, point measurements, type of arterial stiffness instrumentation, method used to identify the foot of the pulse wave when applicable, position of subjects during measurements; b) ***Sample characteristics***: age at the time of measurement, sex distribution, HD vintage, comorbidities (diabetes, hypertension, smoking status, prior history of cardiovascular disease), HD session duration, electrolyte concentration of dialysate (calcium, magnesium), dialysis filter, volume overload; c) ***Outcomes***: peri and intra-dialytic changes in arterial stiffness based on the above-mentioned methods (carotid-femoral PWV, carotid-radial PWV, brachial-ankle PWV, femoral-tibial PWV, aortic and central pulse wave analysis (augmentation index and central pulse pressure), stiffness

1  
2  
3 index and local vascular distensibility, compliance and incremental elastic modulus, heart rate, and  
4 arterial pressure. Study investigators will be contacted by email to gather unreported data or  
5 additional details. Extraction of data will be done by two independent reviewers, on separate Excel  
6 spreadsheet. Disagreements will be resolved by a third reviewer.  
7  
8  
9  
10  
11  
12  
13

### 14 **Risk assessment of bias**

15  
16 Internal validity of randomized controlled trials will be assessed using the Cochrane Collaboration  
17 Risk of Bias tool. In the case of non-randomized studies, risk of bias will be assessed using the  
18 ROBINS-I tool. Two reviewers will independently evaluate the possibility of bias in seven different  
19 domains including confounding factors (heart rate, mean arterial pressure, fluid removal by HD),  
20 selection of participants (unstable participants), classification of the intervention (hypotensive  
21 event-free), deviation from the intended intervention, missing data, measurement of outcomes  
22 (seated vs supine) and selection of the reported results. Each domain will be judged as either low,  
23 moderate, serious or critical risk of bias or no information available. An overall assessment of study  
24 bias summarizing all domains will be tabulated. A third reviewer will settle unresolved  
25 disagreements. In addition, information on the source of funding will be collected to assess  
26 conflicts of interest.  
27  
28  
29  
30  
31  
32  
33  
34  
35  
36  
37  
38  
39  
40  
41  
42  
43

### 44 **Data synthesis and analysis plan**

45  
46 All studies fulfilling the eligibility criteria will be included in quantitative and qualitative synthesis.  
47  
48 Study characteristics will be presented as means and standard deviation or median and inter-  
49 quartile ranges for continuous variables and numbers and percentages for categorical variables. For  
50 continuous data, an inverse variance method with random effect models will be used to pool the  
51 mean difference or standardized mean difference if studies reported different scales for the  
52  
53  
54  
55  
56  
57  
58  
59  
60

1  
2  
3 assessment of the same outcome. Dichotomous variables will be extracted from individual studies  
4  
5 and combined using Mantel-Haenszel method with random effects models to pool relative risks.  
6  
7 All analyses will be performed with RevMan 5.3 (Computer program, Version 5.3 Copenhagen:  
8  
9 The Nordic Cochrane Centre, The Cochrane Collaboration, 2014). Pooled effect sizes and their  
10  
11 95% confidence limits will be reported. If quantitative synthesis is not appropriate, studies will be  
12  
13 described individually according to intervention and outcomes reported in a summary table.  
14  
15

16  
17  
18  
19 Between-study heterogeneity will be characterized with the Cochrane's  $I^2$  and will be interpreted  
20  
21 as low (0-30%), moderate (30-60%), and considerable >60%.  
22  
23

24  
25 A meta-regression is planned in case of a considerable heterogeneity among studies and if the  
26  
27 number of studies is sufficient (> 10 by covariate) [11]. Factors such as age of participants, HD  
28  
29 vintage, comorbidities (diabetes, heart failure, etc.), amount of liquid overload, heart rate, and mean  
30  
31 arterial pressure will be considered as covariates if adjusted outcomes are not available or  
32  
33 stratification has not been performed. These analyses will be performed using R (R Core Team  
34  
35 (2020). R: A language and environment for statistical computing. R Foundation for Statistical  
36  
37 Computing, Vienna, Austria) with the Metafor package (Viechtbauer W (2010). "Conducting meta-  
38  
39 analyses in R with the metafor package." Journal of Statistical Software, 36(3), 1–48.  
40  
41 <https://www.jstatsoft.org/v36/i03/>).  
42  
43  
44  
45  
46  
47  
48

### 49 **Sensitivity analysis**

50  
51 Sensitivity analysis according to study design and high risk of study bias will be performed to  
52  
53 explore sources of statistical heterogeneity.  
54  
55  
56  
57

### **Subgroup analysis**

Peripheral arterial segments are constituted of a higher proportion of vascular smooth muscle cells, in contrast with the high elastin and collagen content of the aorta. Due to intravascular volume correction and sympathetic activation at the end of a HD session, we hypothesized that PWV of central large arteries and peripheral muscular arteries will not respond to the same extent despite adjustments for arterial pressure and heart rate. Therefore, we plan to perform subgroup analysis to pool data of PWV with respect elastic (aorta), muscular-medium sized arteries (carotid-radial PWV, femoral-pedal PWV), and global PWV, which includes both elastic and muscular vessels (brachial-ankle PWV, carotid-pedal PWV). We will also plan another subgroup analysis by pooling regional PWV or local biomarkers of arterial stiffness depending on whether the information involves elastic versus muscular vessels.

### **Meta-bias**

We will attempt to avoid reporting bias by using a sensitive and reproducible search strategy, including as many keywords and synonyms as possible. We will also assess the risk of publication bias with funnel plots if at least 10 studies comparing the same group of treatment are included as recommended by the Cochrane handbook [12].

### **Quality of evidence**

To assess the certainty of the evidence and strength of recommendations on the effects of a HD session on arterial stiffness, 2 reviewers will evaluate quality of evidence for each outcome measure according to the 5 domains of GRADE recommendations [13].

### **Amendments**

1  
2  
3 Any protocol amendments will be summarized in the form of a Table, where date of amendment,  
4 description of changes and rationale will be provided.  
5  
6  
7  
8  
9

## 10 **DISCUSSION**

11  
12 Patients with ESRD are at increased risk of aortic stiffness, a known non-traditional marker of  
13 cardiovascular morbidity and mortality. In this population, optimization of non-traditional risk  
14 factors may not be as effective in improving clinical outcomes compared to general population  
15 [14], highlighting the importance of addressing aortic stiffness and limiting its consequences,  
16 namely on end-organ damage. However, adequate risk prediction, and eventually intervention,  
17 requires that aortic stiffness be measured in a reliable and systematic way, which can be challenging  
18 in some clinical settings. Furthermore, there is still limited understanding of how measurements of  
19 vascular stiffness differ along the arterial tree [15], especially under conditions of hemodynamics  
20 stress, such as with HD.  
21  
22  
23  
24  
25  
26  
27  
28  
29  
30  
31  
32  
33

34 Vascular stiffness assessment in ESRD patients is usually made in the pre-dialytic period to avoid  
35 having patients come in for clinical evaluation on their HD-free days. ESRD patients undergoing  
36 HD generally receive this intermittent treatment thrice weekly in clinical setting, few having the  
37 autonomy and/or support necessary for at-home HD. As a result, assessing aortic stiffness before  
38 or after HD appears as the most convenient timing. However, little is known as to the effect of the  
39 treatment itself on the reliability of vascular stiffness assessments, few studies having considered  
40 this issue, and generally with a small number of subjects.  
41  
42  
43  
44  
45  
46  
47  
48  
49  
50

51 Measurements and estimates of aortic stiffness are used as mechanical biomarkers in the clinical  
52 evaluation of ESRD patients. Pulse wave velocity based methodologies are most commonly and  
53 reliably used to evaluate arterial stiffness, both in central elastic vessels (aorta, carotid artery) and  
54  
55  
56  
57

1  
2  
3 in more peripheral medium-sized muscular arteries (brachial, radial arteries). The pulse transit  
4  
5 times obtained with these methods reflect the stiffness of the arterial segment between  
6  
7 measurement sites. In addition, hemodynamic consequences of aortic stiffness can be evaluated  
8  
9 using analysis of aortic or otherwise central pulse pressure waveform morphology, whilst local  
10  
11 arterial mechanics (distensibility, compliance or incremental elastic modulus) can be evaluated in  
12  
13 a site-specific manner either at central or peripheral arterial sites [7].  
14  
15  
16  
17  
18  
19

20 As described earlier, HD is not a physiological treatment. Its known effects on blood pressure,  
21  
22 intravascular volume, tissue perfusion and sympathetic nervous activation are likely to alter  
23  
24 measures and estimates of arterial stiffness, at the very least in some arterial segments [1, 16, 17].  
25  
26

27 Inconsistent methodologies and consequent findings not only obscure our understanding of the  
28  
29 determinants of vascular stiffness in ESRD, but may also hinder the predictive value of these  
30  
31 mechanical biomarkers when assessing cardiovascular risk in this population [18, 19]. This  
32  
33 proposed review aims to resolve these issues by evaluating the acute effect of HD on measurements  
34  
35 and estimates of vascular stiffness, and by suggesting the most appropriate, yet convenient, timing  
36  
37 for vascular stiffness assessment in ESRD.  
38  
39  
40  
41  
42  
43

## 44 **CONCLUSIONS**

45  
46  
47 End-stage renal disease patients are at high risk of cardiovascular morbidity and mortality, a risk  
48  
49 which is mediated in part by increased aortic stiffness, a non-traditional cardiovascular risk factor.

50  
51 Various mechanical biomarkers are used to measure or estimate aortic and arterial stiffness.

52  
53  
54 However, little is known of the robustness of each of these parameters under extreme hemodynamic  
55  
56  
57  
58  
59  
60



1  
2  
3 conditions that occur during a hemodialysis treatment. Our review will provide a better  
4  
5 understanding of the impact of hemodialysis on measures of aortic stiffness and provide the  
6  
7 necessary evidence to recommend the most adequate timing of vascular assessment in ESRD  
8  
9 patients.  
10  
11  
12  
13  
14  
15  
16  
17  
18  
19  
20  
21  
22  
23  
24  
25  
26  
27  
28  
29  
30  
31  
32  
33  
34  
35  
36  
37  
38  
39  
40  
41  
42  
43  
44  
45  
46  
47  
48  
49  
50  
51  
52  
53  
54  
55  
56  
57  
58  
59  
60

For peer review only

## REFERENCES

1. Rubinger, D., R. Backenroth, and D. Sapoznikov, *Sympathetic nervous system function and dysfunction in chronic hemodialysis patients*. *Semin Dial*, 2013. **26**(3): p. 333-43.
2. Ronco, C. and W.R. Clark, *Haemodialysis membranes*. *Nat Rev Nephrol*, 2018. **14**(6): p. 394-410.
3. Locatelli, F., et al., *Optimizing haemodialysate composition*. *Clin Kidney J*, 2015. **8**(5): p. 580-9.
4. Sidibe, A., et al., *Reduction of Arterial Stiffness After Kidney Transplantation: A Systematic Review and Meta-Analysis*. *J Am Heart Assoc*, 2017. **6**(12).
5. Laurent, S., Boutouyrie P., Amsar R., Gautier I., Laloux B., Guize L., Ducimetière P., Benetos A., *Aortic Stiffness Is an Independent Predictor of All-Cause and Cardiovascular Mortality in Hypertensive Patients*. *Hypertension*, 2001. **37**: p. 1236-1241.
6. van de Velde, L., et al., *Myocardial preload alters central pressure augmentation through changes in the forward wave*. *J Hypertens*, 2018. **36**(3): p. 544-551.
7. Laurent, S., L. Marais, and P. Boutouyrie, *The Noninvasive Assessment of Vascular Aging*. *Can J Cardiol*, 2016. **32**(5): p. 669-79.
8. Zanolli, L., et al., *Increased carotid stiffness and remodelling at early stages of chronic kidney disease*. *J Hypertens*, 2019. **37**(6): p. 1176-1182.
9. Liberati, A., et al., *The PRISMA statement for reporting systematic reviews and meta-analyses of studies that evaluate healthcare interventions: explanation and elaboration*. *BMJ*, 2009. **339**: p. b2700.
10. Beller, E.M., et al., *PRISMA for Abstracts: reporting systematic reviews in journal and conference abstracts*. *PLoS Med*, 2013. **10**(4): p. e1001419.

11. Borenstein, J., *Responsible authorship in engineering fields: an overview of current ethical challenges*. *Sci Eng Ethics*, 2011. **17**(2): p. 355-64.
12. Egger M, Davey Smith G, Schneider M, Minder C. *Bias in meta-analysis detected by a simple, graphical test*. *BMJ*. 1997;315:629–34.
13. Guyatt G.H., O.A.D., Vist G.E., Kunz R., Falck-Ytter Y., Alonso-Coello P., Schünemann H.J., *GRADE: an emerging consensus on rating quality of evidence and strength of recommendations*. *BMJ*, 2008. **336**: p. 924-926.
14. van der Zee, S., et al., *Cardiovascular risk factors in patients with chronic kidney disease*. *Nat Rev Cardiol*, 2009. **6**(9): p. 580-9.
15. Fortier, C. and M. Agharazii, *Arterial Stiffness Gradient*. *Pulse (Basel)*, 2016. **3**(3-4): p. 159-66.
16. Marants, R., et al., *Renal Perfusion during Hemodialysis: Intradialytic Blood Flow Decline and Effects of Dialysate Cooling*. *J Am Soc Nephrol*, 2019. **30**(6): p. 1086-1095.
17. Assimon, M.M. and J.E. Flythe, *Intradialytic Blood Pressure Abnormalities: The Highs, The Lows and All That Lies Between*. *Am J Nephrol*, 2015. **42**(5): p. 337-50.
18. Bonarjee, V.V.S., *Arterial Stiffness: A Prognostic Marker in Coronary Heart Disease. Available Methods and Clinical Application*. *Front Cardiovasc Med*, 2018. **5**: p. 64.
19. Laurent, S., et al., *Expert consensus document on arterial stiffness: methodological issues and clinical applications*. *Eur Heart J*, 2006. **27**(21): p. 2588-605.

### **Author statement**

All authors contributed towards the submitted final manuscript. CF is a kinesiologist specialised in chronic kidney disease and postdoctoral researcher. MA is a nephrologist, the lead supervisor and corresponding author. PB is co-supervisor. CF, HO and MP drafted the initial manuscript and received guidance on content, methodology and analysis from AS and MA. MP and CAG are first reviewers, CF and HO are second reviewers. All authors have read and agreed the final manuscript.

### **Funding**

This research received no specific grant from any funding agency in the public, commercial or not-for-profit sectors.

### **Conflicts of interests**

Competing interests: None to declare

### **Technical appendix, statistical code, and dataset available from the Dryad repository**

N/A

**Table 1.** List of inclusion and exclusion criteria for study selection

|                     | <b>Inclusion</b>                                                                                                                                                                                                                                                                                                                          | <b>Exclusion</b>                                                                                                                                                                                                                                                                         |
|---------------------|-------------------------------------------------------------------------------------------------------------------------------------------------------------------------------------------------------------------------------------------------------------------------------------------------------------------------------------------|------------------------------------------------------------------------------------------------------------------------------------------------------------------------------------------------------------------------------------------------------------------------------------------|
| <b>Population</b>   | <ul style="list-style-type: none"> <li>End-stage renal disease (Stage 5 CKD) patients undergoing hemodialysis;</li> </ul>                                                                                                                                                                                                                 | <ul style="list-style-type: none"> <li>Pediatric population (&lt;18 years old)</li> <li>Incident hemodialysis patients (&lt;1month)</li> <li>Critically ill (ex: intensive care unit)</li> </ul>                                                                                         |
| <b>Intervention</b> | <ul style="list-style-type: none"> <li>Dialysis centre-base hemodialysis;</li> <li>Home-based hemodialysis</li> </ul>                                                                                                                                                                                                                     | <ul style="list-style-type: none"> <li>Peritoneal dialysis</li> <li>Non-standard hemodialysis settings (electrolyte concentrations of dialysate, temperature, etc.)</li> <li>Unrelated interventions such as nutritional, pharmaceutical and physical exercise interventions.</li> </ul> |
| <b>Outcome</b>      | <ul style="list-style-type: none"> <li>Functional indices of arterial stiffness: carotid-femoral PWV, carotid-radial PWV, brachial-ankle PWV, femoral-tibial PWV, cardio-ankle vascular index, pulse wave analysis (augmentation index and central pulse pressure), stiffness index, compliance and distensibility</li> </ul>             | <ul style="list-style-type: none"> <li>Peripheral pressure (brachial, finger, toe, etc.)</li> </ul>                                                                                                                                                                                      |
| <b>Study design</b> | <ul style="list-style-type: none"> <li>Repeated measures surrounding a single hemodialysis session.</li> <li>Randomized controlled and cross-over trials (if standard care group);</li> <li>Non-randomized prospective studies (before-and-after design).</li> <li>Articles in English, French, Italian and Spanish languages.</li> </ul> | <ul style="list-style-type: none"> <li>In-vitro or mathematical modeling reports;</li> <li>Case reports</li> <li>Animal studies;</li> <li>Sub-studies of previously reported trials;</li> <li>Narrative reviews;</li> <li>Duplicates.</li> </ul>                                         |

## **Appendix 1. Comprehensive Search Strategy for MEDLINE**

### **Mesh terms:**

#### ➤ **Population:**

- a) Chronic Renal or Kidney Failure
- b) End Stage Renal or Kidney Disease

#### ➤ **Intervention**

- c) Renal Dialysis; renal, extracorporeal
- d) Hemodialysis
- e) Home Hemodialysis
- f) Hemodialysis Solutions, Dialysate

#### ➤ **Comparator**

No restriction

#### ➤ **Outcomes**

### **Metrics of arterial stiffness:**

- g) Vascular stiffness, arterial stiffness, stiffness, aortic stiffness, carotid stiffness, central artery stiffness, large artery stiffness
- h) Stiffness, peripheral, small artery, brachial, femoral
- i) Carotid-femoral pulse wave velocity, carotid-radial pulse wave velocity, femoral-distal pulse wave velocity, pulse transit time,
- j) Brachial-ankle pulse wave velocity
- k) Augmentation index, Pulse wave analysis, central pulse pressure, pressure waveforms
- l) Distensibility, elasticity,
- m)  $\beta$ -stiffness, CAVI

Database: PubMed from inception to 2020 October 14.

### Search Strategy (Intervention AND Outcomes)

- 1 Kidney Failure, Chronic/ (94 073)
- 2 Renal Failure ti.ab.(90 187)
- 3 Kidney Failure ti.ab. (8 750)

- 1
- 2
- 3 4 (#2 or #3) AND chronic ti.ab.(35 520)
- 4 5 Renal disease\* ti.ab.(66 784)
- 5 6 Kidney disease\* ti.ab (86 384)
- 6 7 (OR #2, #3, #5, #6) AND End-Stage ti.ab. (44 753)
- 8 8 ESKD ti.ab (1 262)
- 9 9 ESRD ti.ab (16 791)
- 10 10 (OR #1, #4, #7, #8, #9) (131 528)
- 11 11 Renal Dialysis/ (114 412)
- 12 12 Dialysis ti.ab.OR Dialyses ti.ab.(110 444)
- 13 13 Renal ti.ab. AND #12 (43 530)
- 14 14 Extracorporeal ti.ab. AND #12 (1 657)
- 15 15 Hemodialys\* ti.ab.OR haemodialys\* ti.ab. (78 417)
- 16 16 Hemodialysis Solutions/ (1 606)
- 17 17 Hemodialysis, Home/ (1 943)
- 18 18 Dialysate ti.ab. (10 831)
- 19 19 (OR #11, #13, #14, #15, #16, #17, #18) (154 493)
- 20 20 Vascular Stiffness/ (6 198)
- 21 21 Pulse Wave Analysis/ (4 305)
- 22 22 Carotid-Femoral Pulse Wave Velocity/ (27)
- 23 23 Elastic Modulus/ (10 317)
- 24 24 Vascular Capacitance/ (287)
- 25 25 Cardio Ankle Vascular Index/ (18)
- 26 26 Carotid Intima-Media Thickness/ (5 028)
- 27 27 Vascular ti.ab. AND Stiffness ti.ab. (6 881)
- 28 28 Arter\* ti.ab. AND Stiffness ti.ab. (13 560)
- 29 29 Aort\* ti.ab. AND Stiffness ti.ab. (5 547)
- 30 30 Pulse wave velocit\* ti.ab (9 442)
- 31 31 Pulse wave analys\* ti.ab (1 199)
- 32 32 Pulse wave transit time\* ti.ab (98)
- 33 33 PWV ti.ab. (4 722)
- 34 34 Pulse transit time\* ti.ab. (626)
- 35 35 Carotid femoral pulse wave velocit\* ti.ab. (1 576)
- 36 36 Carotid femoral PWV ti.ab. (316)
- 37 37 CfPWV ti.ab. (254)
- 38 38 Carotid radial pulse wave velocit\* ti.ab. (108)
- 39 39 Carotid radial PWV ti.ab. (78)
- 40 40 Cr PWV ti.ab. (27)
- 41 41 Carotid brachial pulse wave velocit\* ti.ab. (5)
- 42 42 Carotid brachial PWV ti.ab. (5)
- 43 43 Cb PWV ti.ab. (1)
- 44 44 Brachial ankle pulse wave velocit\* ti.ab. (1 439)
- 45 45 Brachial ankle PWV ti.ab. (200)
- 46 46 ba PWV ti.ab. (118)
- 47 47 (aorta ti.ab.OR aortic ti.ab.) AND pulse wave velocit\* ti.ab. (3 481)
- 48 48 (aorta ti.ab.OR aortic ti.ab.) AND PWV ti.ab. (1 850)
- 49 49 Ao PWV ti.ab.(9)
- 50 50 Femoral ankle pulse wave velocit\* ti.ab. (10)
- 51
- 52
- 53
- 54
- 55
- 56
- 57
- 58
- 59
- 60

- 1  
2  
3 51 Femoral ankle PWV ti.ab. (22)  
4 52 Augmentation index ti.ab. (2 998)  
5 53 AIx ti.ab. (1493)  
6 54 Central pulse pressure ti.ab. OR central PP ti.ab. (489)  
7 55 aortic pulse pressure ti.ab. OR aortic PP ti.ab. (301)  
8 56 Elastic modulus ti.ab. (9 499)  
9 57 (Young ti.ab. OR young's ti.ab.) AND modulus ti.ab. (8 810)  
10 58 Vascular capacitance ti.ab. (186)  
11 59 Cardio ankle vascular index ti.ab. (584)  
12 60 CAVI ti.ab. (654)  
13 61 distensibility ti.ab. (4 626)  
14 62 arterial elasticity ti.ab.(519)  
15 63 stiffness index ti.ab. OR  $\beta$  stiffness ti.ab. (1 597)  
16 64 (OR #20-#64) (53 637)  
17  
18  
19  
20 64 (#19 AND #64) (1 081)  
21  
22  
23  
24 65 AND humans[filter] (987)  
25  
26  
27  
28  
29  
30  
31  
32  
33  
34  
35  
36  
37  
38  
39  
40  
41  
42  
43  
44  
45  
46  
47  
48  
49  
50  
51  
52  
53  
54  
55  
56  
57  
58  
59  
60



# Reporting checklist for protocol of a systematic review.

Based on the PRISMA-P guidelines.

## Instructions to authors

Complete this checklist by entering the page numbers from your manuscript where readers will find each of the items listed below.

Your article may not currently address all the items on the checklist. Please modify your text to include the missing information. If you are certain that an item does not apply, please write "n/a" and provide a short explanation.

Upload your completed checklist as an extra file when you submit to a journal.

In your methods section, say that you used the PRISMA-Reporting guidelines, and cite them as:

Moher D, Shamseer L, Clarke M, Ghersi D, Liberati A, Petticrew M, Shekelle P, Stewart LA. Preferred Reporting Items for Systematic Review and Meta-Analysis Protocols (PRISMA-P) 2015 statement. Syst Rev. 2015;4(1):1.

|                |                     |                                                                                    | Page   |
|----------------|---------------------|------------------------------------------------------------------------------------|--------|
|                |                     | Reporting Item                                                                     | Number |
| <b>Title</b>   |                     |                                                                                    |        |
| Identification | <a href="#">#1a</a> | Identify the report as a protocol of a systematic review                           | 1      |
| Update         | <a href="#">#1b</a> | If the protocol is for an update of a previous systematic review, identify as such | N/A    |

1 **Registration**

2

3

4 [#2](#) If registered, provide the name of the registry (such as 2  
5  
6 PROSPERO) and registration number  
7  
8

9 **Authors**

10

11

12

13 **Contact** [#3a](#) Provide name, institutional affiliation, e-mail address of all 1  
14  
15 protocol authors; provide physical mailing address of  
16  
17 corresponding author  
18

19 **Contribution** [#3b](#) Describe contributions of protocol authors and identify the 16  
20  
21 guarantor of the review  
22  
23  
24

25 **Amendments**

26

27

28

29 [#4](#) If the protocol represents an amendment of a previously N/A  
30  
31 completed or published protocol, identify as such and list  
32  
33 changes; otherwise, state plan for documenting important  
34  
35 protocol amendments  
36  
37  
38

39 **Support**

40

41

42 **Sources** [#5a](#) Indicate sources of financial or other support for the review 16  
43  
44

45 **Sponsor** [#5b](#) Provide name for the review funder and / or sponsor N/A  
46  
47

48 **Role of sponsor or** [#5c](#) Describe roles of funder(s), sponsor(s), and / or N/A  
49  
50 funder  
51 institution(s), if any, in developing the protocol  
52

53 **Introduction**

54

55

56

57

58

59

60

|    |                      |                      |                                                                 |       |
|----|----------------------|----------------------|-----------------------------------------------------------------|-------|
| 1  | Rationale            | <a href="#">#6</a>   | Describe the rationale for the review in the context of what is | 4-5   |
| 2  |                      |                      | already known                                                   |       |
| 3  |                      |                      |                                                                 |       |
| 4  |                      |                      |                                                                 |       |
| 5  |                      |                      |                                                                 |       |
| 6  | Objectives           | <a href="#">#7</a>   | Provide an explicit statement of the question(s) the review     | 5-6   |
| 7  |                      |                      | will address with reference to participants, interventions,     |       |
| 8  |                      |                      | comparators, and outcomes (PICO)                                |       |
| 9  |                      |                      |                                                                 |       |
| 10 |                      |                      |                                                                 |       |
| 11 |                      |                      |                                                                 |       |
| 12 |                      |                      |                                                                 |       |
| 13 |                      |                      |                                                                 |       |
| 14 | <b>Methods</b>       |                      |                                                                 |       |
| 15 |                      |                      |                                                                 |       |
| 16 |                      |                      |                                                                 |       |
| 17 | Eligibility criteria | <a href="#">#8</a>   | Specify the study characteristics (such as PICO, study          | 6-7   |
| 18 |                      |                      | design, setting, time frame) and report characteristics (such   |       |
| 19 |                      |                      | as years considered, language, publication status) to be        |       |
| 20 |                      |                      | used as criteria for eligibility for the review                 |       |
| 21 |                      |                      |                                                                 |       |
| 22 |                      |                      |                                                                 |       |
| 23 |                      |                      |                                                                 |       |
| 24 |                      |                      |                                                                 |       |
| 25 |                      |                      |                                                                 |       |
| 26 |                      |                      |                                                                 |       |
| 27 | Information          | <a href="#">#9</a>   | Describe all intended information sources (such as              | 7     |
| 28 |                      |                      | electronic databases, contact with study authors, trial         |       |
| 29 | sources              |                      | registers or other grey literature sources) with planned dates  |       |
| 30 |                      |                      | of coverage                                                     |       |
| 31 |                      |                      |                                                                 |       |
| 32 |                      |                      |                                                                 |       |
| 33 |                      |                      |                                                                 |       |
| 34 |                      |                      |                                                                 |       |
| 35 |                      |                      |                                                                 |       |
| 36 |                      |                      |                                                                 |       |
| 37 | Search strategy      | <a href="#">#10</a>  | Present draft of search strategy to be used for at least one    | 18-20 |
| 38 |                      |                      | electronic database, including planned limits, such that it     |       |
| 39 |                      |                      | could be repeated                                               |       |
| 40 |                      |                      |                                                                 |       |
| 41 |                      |                      |                                                                 |       |
| 42 |                      |                      |                                                                 |       |
| 43 |                      |                      |                                                                 |       |
| 44 |                      |                      |                                                                 |       |
| 45 | Study records -      | <a href="#">#11a</a> | Describe the mechanism(s) that will be used to manage           | 8     |
| 46 |                      |                      | records and data throughout the review                          |       |
| 47 | data management      |                      |                                                                 |       |
| 48 |                      |                      |                                                                 |       |
| 49 |                      |                      |                                                                 |       |
| 50 | Study records -      | <a href="#">#11b</a> | State the process that will be used for selecting studies       | 8-10  |
| 51 |                      |                      | (such as two independent reviewers) through each phase of       |       |
| 52 | selection process    |                      | the review (that is, screening, eligibility and inclusion in    |       |
| 53 |                      |                      | meta-analysis)                                                  |       |
| 54 |                      |                      |                                                                 |       |
| 55 |                      |                      |                                                                 |       |
| 56 |                      |                      |                                                                 |       |
| 57 |                      |                      |                                                                 |       |
| 58 |                      |                      |                                                                 |       |
| 59 |                      |                      |                                                                 |       |
| 60 |                      |                      |                                                                 |       |

|                                                          |                                               |                      |                                                                                                                                                                                                                                                                    |       |
|----------------------------------------------------------|-----------------------------------------------|----------------------|--------------------------------------------------------------------------------------------------------------------------------------------------------------------------------------------------------------------------------------------------------------------|-------|
| 1<br>2<br>3<br>4<br>5<br>6<br>7<br>8<br>9<br>10          | Study records -<br>data collection<br>process | <a href="#">#11c</a> | Describe planned method of extracting data from reports<br>(such as piloting forms, done independently, in duplicate),<br>any processes for obtaining and confirming data from<br>investigators                                                                    | 8-9   |
| 11<br>12<br>13<br>14<br>15<br>16<br>17<br>18             | Data items                                    | <a href="#">#12</a>  | List and define all variables for which data will be sought<br>(such as PICO items, funding sources), any pre-planned<br>data assumptions and simplifications                                                                                                      | 8-9   |
| 19<br>20<br>21<br>22<br>23<br>24<br>25                   | Outcomes and<br>prioritization                | <a href="#">#13</a>  | List and define all outcomes for which data will be sought,<br>including prioritization of main and additional outcomes, with<br>rationale                                                                                                                         | 6-7   |
| 26<br>27<br>28<br>29<br>30<br>31<br>32<br>33<br>34<br>35 | Risk of bias in<br>individual studies         | <a href="#">#14</a>  | Describe anticipated methods for assessing risk of bias of<br>individual studies, including whether this will be done at the<br>outcome or study level, or both; state how this information<br>will be used in data synthesis                                      | 9     |
| 36<br>37<br>38<br>39<br>40                               | Data synthesis                                | <a href="#">#15a</a> | Describe criteria under which study data will be<br>quantitatively synthesised                                                                                                                                                                                     | 9-10  |
| 41<br>42<br>43<br>44<br>45<br>46<br>47<br>48<br>49<br>50 | Data synthesis                                | <a href="#">#15b</a> | If data are appropriate for quantitative synthesis, describe<br>planned summary measures, methods of handling data and<br>methods of combining data from studies, including any<br>planned exploration of consistency (such as I <sup>2</sup> , Kendall's $\tau$ ) | 9-10  |
| 51<br>52<br>53<br>54<br>55<br>56<br>57<br>58<br>59<br>60 | Data synthesis                                | <a href="#">#15c</a> | Describe any proposed additional analyses (such as<br>sensitivity or subgroup analyses, meta-regression)                                                                                                                                                           | 10-11 |

|    |                |                      |                                                                 |    |
|----|----------------|----------------------|-----------------------------------------------------------------|----|
| 1  | Data synthesis | <a href="#">#15d</a> | If quantitative synthesis is not appropriate, describe the type | 10 |
| 2  |                |                      | of summary planned                                              |    |
| 3  |                |                      |                                                                 |    |
| 4  |                |                      |                                                                 |    |
| 5  |                |                      |                                                                 |    |
| 6  | Meta-bias(es)  | <a href="#">#16</a>  | Specify any planned assessment of meta-bias(es) (such as        | 11 |
| 7  |                |                      | publication bias across studies, selective reporting within     |    |
| 8  |                |                      | studies)                                                        |    |
| 9  |                |                      |                                                                 |    |
| 10 |                |                      |                                                                 |    |
| 11 |                |                      |                                                                 |    |
| 12 |                |                      |                                                                 |    |
| 13 |                |                      |                                                                 |    |
| 14 | Confidence in  | <a href="#">#17</a>  | Describe how the strength of the body of evidence will be       | 11 |
| 15 | cumulative     |                      | assessed (such as GRADE)                                        |    |
| 16 | evidence       |                      |                                                                 |    |
| 17 |                |                      |                                                                 |    |
| 18 |                |                      |                                                                 |    |
| 19 |                |                      |                                                                 |    |
| 20 |                |                      |                                                                 |    |
| 21 |                |                      |                                                                 |    |

22 None The PRISMA-P checklist is distributed under the terms of the Creative Commons Attribution  
23 License CC-BY 4.0. This checklist can be completed online using <https://www.goodreports.org/>, a tool  
24 made by the [EQUATOR Network](#) in collaboration with [Penelope.ai](#)  
25  
26  
27  
28  
29  
30  
31  
32  
33  
34  
35  
36  
37  
38  
39  
40  
41  
42  
43  
44  
45  
46  
47  
48  
49  
50  
51  
52  
53  
54  
55  
56  
57  
58  
59  
60

# BMJ Open

## Changes in arterial stiffness indices during a single hemodialysis session in end-stage renal disease population -- A systematic review and meta-analysis protocol

|                                 |                                                                                                                                                                                                                                                                                                                                                                                                                                                                                                                                                                                                                                                                                                                                                                                                                                                                                                                                                                                                                                                                |
|---------------------------------|----------------------------------------------------------------------------------------------------------------------------------------------------------------------------------------------------------------------------------------------------------------------------------------------------------------------------------------------------------------------------------------------------------------------------------------------------------------------------------------------------------------------------------------------------------------------------------------------------------------------------------------------------------------------------------------------------------------------------------------------------------------------------------------------------------------------------------------------------------------------------------------------------------------------------------------------------------------------------------------------------------------------------------------------------------------|
| Journal:                        | <i>BMJ Open</i>                                                                                                                                                                                                                                                                                                                                                                                                                                                                                                                                                                                                                                                                                                                                                                                                                                                                                                                                                                                                                                                |
| Manuscript ID                   | bmjopen-2020-045912.R1                                                                                                                                                                                                                                                                                                                                                                                                                                                                                                                                                                                                                                                                                                                                                                                                                                                                                                                                                                                                                                         |
| Article Type:                   | Protocol                                                                                                                                                                                                                                                                                                                                                                                                                                                                                                                                                                                                                                                                                                                                                                                                                                                                                                                                                                                                                                                       |
| Date Submitted by the Author:   | 27-Mar-2021                                                                                                                                                                                                                                                                                                                                                                                                                                                                                                                                                                                                                                                                                                                                                                                                                                                                                                                                                                                                                                                    |
| Complete List of Authors:       | Fortier, Catherine; INSERM U970, Paris Cardiovascular Research Center (PARCC), Team 7; CHU de Québec-Université Laval, Research Center-L'Hôtel-Dieu de Québec, Division of Nephrology<br>Obeid, Hasan; CHU de Québec-Université Laval, Research Center-L'Hôtel-Dieu de Québec, Division of Nephrology<br>Paré, Mathilde; CHU de Québec-Université Laval, Research Center-L'Hôtel-Dieu de Québec, Division of Nephrology<br>Garneau, Charles-Antoine; CHU de Québec-Université Laval, Research Center-L'Hôtel-Dieu de Québec, Division of Nephrology<br>Sidibé, Aboubacar; CHU de Québec-Université Laval, Research Center-L'Hôtel-Dieu de Québec, Division of Nephrology<br>Boutouyrie, Pierre; INSERM U970, Paris Cardiovascular Research Center (PARCC), Team 7; APHP, Pharmacology Unit, Hôpital Européen Georges Pompidou, Université de Paris<br>Agharazii, Mohsen; CHU de Québec-Université Laval, Research Center-L'Hôtel-Dieu de Québec, Division of Nephrology; Université Laval Faculté de médecine, Department of medicine, Division of Nephrology. |
| <b>Primary Subject Heading</b>: | Renal medicine                                                                                                                                                                                                                                                                                                                                                                                                                                                                                                                                                                                                                                                                                                                                                                                                                                                                                                                                                                                                                                                 |
| Secondary Subject Heading:      | Cardiovascular medicine                                                                                                                                                                                                                                                                                                                                                                                                                                                                                                                                                                                                                                                                                                                                                                                                                                                                                                                                                                                                                                        |
| Keywords:                       | Dialysis < NEPHROLOGY, End stage renal failure < NEPHROLOGY, Hypertension < CARDIOLOGY, CLINICAL PHYSIOLOGY                                                                                                                                                                                                                                                                                                                                                                                                                                                                                                                                                                                                                                                                                                                                                                                                                                                                                                                                                    |
|                                 |                                                                                                                                                                                                                                                                                                                                                                                                                                                                                                                                                                                                                                                                                                                                                                                                                                                                                                                                                                                                                                                                |

SCHOLARONE™  
Manuscripts



I, the Submitting Author has the right to grant and does grant on behalf of all authors of the Work (as defined in the below author licence), an exclusive licence and/or a non-exclusive licence for contributions from authors who are: i) UK Crown employees; ii) where BMJ has agreed a CC-BY licence shall apply, and/or iii) in accordance with the terms applicable for US Federal Government officers or employees acting as part of their official duties; on a worldwide, perpetual, irrevocable, royalty-free basis to BMJ Publishing Group Ltd ("BMJ") its licensees and where the relevant Journal is co-owned by BMJ to the co-owners of the Journal, to publish the Work in this journal and any other BMJ products and to exploit all rights, as set out in our [licence](#).

The Submitting Author accepts and understands that any supply made under these terms is made by BMJ to the Submitting Author unless you are acting as an employee on behalf of your employer or a postgraduate student of an affiliated institution which is paying any applicable article publishing charge ("APC") for Open Access articles. Where the Submitting Author wishes to make the Work available on an Open Access basis (and intends to pay the relevant APC), the terms of reuse of such Open Access shall be governed by a Creative Commons licence – details of these licences and which [Creative Commons](#) licence will apply to this Work are set out in our licence referred to above.

Other than as permitted in any relevant BMJ Author's Self Archiving Policies, I confirm this Work has not been accepted for publication elsewhere, is not being considered for publication elsewhere and does not duplicate material already published. I confirm all authors consent to publication of this Work and authorise the granting of this licence.

1  
2  
3 **Changes in arterial stiffness indices during a single hemodialysis session in end-stage renal**  
4 **disease population -- A systematic review and meta-analysis protocol**  
5  
6  
7

8 Authors: Catherine FORTIER<sup>1,2</sup>, Hasan OBEID<sup>2</sup>, Mathilde PARÉ<sup>2</sup>, Charles-Antoine  
9 GARNEAU<sup>2</sup>, Aboubacar SIDIBÉ<sup>2</sup>, Pierre BOUTOUYRIE<sup>1,3</sup>, Mohsen AGHARAZII<sup>2,4</sup>.  
10  
11

12  
13 <sup>1</sup> INSERM U970, Paris Cardiovascular Research Center (PARCC), Team 7, Paris, France.  
14

15 <sup>2</sup> CHU de Québec-Université Laval Research Center-L'Hôtel-Dieu de Québec, Division of  
16 Nephrology, Québec, Québec, Canada.  
17

18 <sup>3</sup> APHP, Pharmacology Unit, Hôpital Européen Georges Pompidou, Université de Paris, Paris,  
19 Île-de-France, France.  
20

21 <sup>4</sup> Université Laval Faculté de médecine, Department of medicine, Division of Nephrology,  
22 Québec, Québec, Canada.  
23  
24

25  
26 catherine.fortier@inserm.fr  
27

28 hasan.obeid@crchudequebec.ulaval.ca  
29

30 mathilde.pare.1@ulaval.ca  
31

32 charles-antoine.garneau.2@ulaval.ca  
33

34 aboubacar.sidibe.1@ulaval.ca  
35

36 pierre.boutouyrie@aphp.fr  
37  
38  
39

40 **Word Count:** 2 498 words  
41

42 **Corresponding author:**

43 Mohsen Agharazii, MD

44 CHU de Québec-Université Laval

45 Research Center-L'Hôtel-Dieu de Québec

46 Division of Nephrology  
47

48 11, Côte du Palais,  
49 Québec, Québec, Canada

50 G1R 2J6

51

52 Tél: 418-691-5464

53 Fax: 418-691-5562

54 [mohsen.agharazii@crchudequebec.ulaval.ca](mailto:mohsen.agharazii@crchudequebec.ulaval.ca)  
55  
56  
57  
58  
59  
60



## ABSTRACT

**Introduction:** End-stage renal disease patients are at higher risk of cardiovascular morbidity and mortality, a risk mediated in part by increased aortic stiffness. Arterial stiffness is assessed at different anatomical locations (central elastic or peripheral muscular arteries) using a variety of mechanical biomarkers. However, little is known on the robustness of each of these mechanical biomarkers following a hemodynamic stress caused by a single hemodialysis session.

**Methods and analysis:** A systematic review has been designed and reported in accordance with the Preferred Reporting Items for Systematic review and Meta-Analysis Protocols. A targeted search strategy applicable in key databases (PubMed, Embase, the Cochrane Library, Web of Science and grey literature) is constructed to search articles and reviews from inception to October 16<sup>th</sup> 2020. Only articles of studies conducted with adults under chronic hemodialysis for kidney failure, with repeated measures of arterial stiffness metrics (pulse wave velocity, augmentation index, arterial distensibility or stiffness) following a before-and-after design surrounding a hemodialysis session will be selected. The screening process, data extraction and assessment of risk bias (ROBINS-I tool) will be done by two independent pairs of reviewers. Meta-analysis will enable adjustments for potential confounders and subgroup analyses will be performed to discriminate changes in arterial stiffness metrics from elastic, muscular or global arterial territories.

**Prospero registration number: CRD42020213946**

**Keywords:** hemodialysis, end-stage renal disease, arterial stiffness, pulse wave velocity, PWV, pulse wave analysis, augmentation index, central pulse pressure, distensibility, arterial compliance.

## ARTICLE SUMMARY

### Strengths and limitations

- Selection of before-and-after design studies will enable a better comprehension of the effect of hemodynamic stress that occurs during hemodialysis session on arterial mechanical properties.
- Subgroup analysis according to site of blood vessels (central elastic vs. peripheral muscular) is a relevant approach to explain discrepancies of arterial stiffness changes during hemodialysis, as large elastic and medium-sized muscular arteries may behave differently during excess liquid removal and sympathetic activation.
- Meta-regression will help assessing the extent of the impact of potential clinical and hemodynamic confounders on the different arterial stiffness indices during a hemodialysis session
- Implementing well-validated scales for the assessment of risk of bias and certainty of evidence will minimize misinterpretation.
- Potential diversity and heterogeneity of arterial stiffness markers may limit quantitative analyses.

## INTRODUCTION

Hemodialysis (HD) is the most common treatment for patients with end-stage renal disease (ESRD). Its intermittent regimen, usually thrice weekly, leads to inexorable retention of solutes, toxins, and excess volume during the interdialytic period (2-3 days), which are partially corrected during the subsequent HD (i.e. usually 4 hours). Despite its vital role, HD is not a physiological treatment. A high ultrafiltration rate during this short period reduces intravascular blood volume leading to a decrease in blood pressure and coronary flow, hypoperfusion of vital vascular beds, and reflex activation of sympathetic nervous system which causes tachycardia [1]. Moreover, during HD, the dialysis membrane is a site where blood has substantial contact with non-biological material, activating white blood cells and their downstream biological reactions which involve activation of complement alternative pathway [2]. In addition, electrolyte composition of dialysis solution may alter cardiovascular response through the acute changes in serum calcium and magnesium concentrations [3].

Patients with chronic kidney disease are at increased risk of aortic stiffness through various biological processes [4]. Aortic stiffness is a non-traditional mechanical biomarker of cardiovascular morbidity and mortality [5], which increases cardiac workload and pulse pressure transmission along the arterial tree. Classically, aortic stiffness is evaluated non-invasively by measuring or estimating carotid-femoral pulse wave velocity (PWV). Other methods aim to quantify the hemodynamic consequences of aortic stiffness through analysis of aortic pulse pressure waveform morphology and determination of central augmentation index (AIx) as a measure of pressure wave reflection [6]. There are also other systems that use heart-ankle PWV or brachial-ankle PWV which incorporates not only the stiffness of aorta (central elastic vessel), but also the stiffness of medium-sized muscular vessels [7]. It is also possible to study local arterial

1  
2  
3 stiffness [8], for example, by studying pressure-diameter relationship throughout the cardiac cycle  
4  
5 for arteries such as the common carotid artery (elastic) or radial artery (muscular). Due to the  
6  
7 heterogeneity of the arterial wall composition and dimension, various vascular segments behave  
8  
9 differently in response to pathological conditions, volume status, blood pressure, heart rate and  
10  
11 sympathetic activity. To what extent a single session of HD affects these measurements is not only  
12  
13 important scientifically, but also clinically. Indeed, if the timing of measurement, with respect to  
14  
15 HD, is important, it could have a significant impact on the predictive value of these mechanical  
16  
17 biomarkers. Furthermore, because of the heterogeneity of the arterial tree and the various methods  
18  
19 used to estimate vascular stiffness, conclusions drawn from different observations may vary  
20  
21 according to site of measurement and methodology. Finally, studies addressing this question are  
22  
23 scarce, and usually include a small number of subjects, which could hamper the reliability of their  
24  
25 conclusions. Therefore, we propose to conduct a systematic review and a meta-analysis to estimate  
26  
27 the impact of a single session of HD on markers of arterial stiffness in an attempt to recommend  
28  
29 the best timing of measurement with respect to HD. If possible, we will examine whether all  
30  
31 vascular segments and markers of arterial stiffness point towards the same conclusion. Whilst  
32  
33 pursuing these goals, this review will highlight the strengths and weaknesses of the reported  
34  
35 studies, and determine if there is a need for further well-designed investigations.  
36  
37  
38  
39  
40  
41  
42  
43  
44  
45

## 46 **Objectives**

47  
48 The major objective of this review is to determine the acute effect of a single HD session on  
49  
50 mechanical biomarkers of arterial stiffness including: carotid-femoral PWV, carotid-radial PWV,  
51  
52 brachial-ankle PWV, femoral-tibial PWV, aortic pulse wave analysis, central pulse wave analysis  
53  
54  
55  
56  
57

(augmentation index and central pulse pressure), aortic/carotid/femoral/radial distension metrics, compliance or incremental elastic modulus.

## **METHODS**

### **Design**

We will conduct this systematic review and meta-analysis in accordance with this predefined protocol which is reported in line with the Preferred Reporting Items for Systematic Reviews and Meta Analyses Protocols (PRISMA-P) checklist [9, 10].

### **Population and eligibility criteria**

In this review, we will include all studies conducted amongst adult patients ( $\geq 18$  years old) with ESRD undergoing chronic HD, either in hospital setting or at home.

### **Intervention**

In this review, a single HD session will be considered as the main intervention.

### **Outcomes**

The primary outcome will be the change in arterial stiffness using PWV-based measurements. Pulse wave velocity is the most widely accepted and used method to measure arterial stiffness by determination of pulse transit time between two points over an arterial segment (m/s). Arterial segments may include central large elastic and peripheral muscular arteries in different proportions such as carotid-femoral PWV, estimated aortic PWV, brachial-ankle PWV, carotid-radial PWV, femoral-distal PWV.

1  
2  
3  
4  
5  
6  
7  
8  
9  
10  
11  
12  
13  
14  
15  
16  
17  
18  
19  
20  
21  
22  
23  
24  
25  
26  
27  
28  
29  
30  
31  
32  
33  
34  
35  
36  
37  
38  
39  
40  
41  
42  
43  
44  
45  
46  
47  
48  
49  
50  
51  
52  
53  
54  
55  
56  
57  
58  
59  
60

Secondary outcomes will be based on biomarkers of arterial stiffness such central pulse pressure, central augmentation index, arterial distensibility, compliance and incremental elastic modulus of aorta, carotid, femoral and radial arteries. We will report absolute values as well as between-group mean differences in their respective units of measurement per biomarker.

### Study design

We will include all observational studies with repeated measures of arterial stiffness or central pressure with a before-and-after design surrounding a HD session. In the case of interventional studies, the values of the reference group (standard care) will be used in the analysis. We will exclude non-human studies, narrative reviews, in-vitro or mathematical modeling reports. Duplicate or sub-study of previously published investigations will be removed.

### Search Strategy

Our search strategy includes bibliographic databases (PubMed, Embase, The Cochrane Library and Web of Science), references lists of eligible studies and review articles, trials registers and grey literature from inception to October 16<sup>th</sup> 2020. MeSH terms will be used to target articles relevant to the research question. Our proposed literature search strategy is outlined in *Appendix 1*. Manual screening of the reference list will be conducted based on pre-defined criteria listed in *Table 1*. No language restrictions or publication period will be imposed on the initial searches; however, our final analysis will be limited to articles originally reported in English, French, Italian and Spanish. Searches will be re-run just before the final analyses and any further identified studies will be retrieved for inclusion. Unpublished studies will not be sought. Duplicate citations will be removed.

**Table 1.** List of inclusion and exclusion criteria for study selection

|                     | <b>Inclusion</b>                                                                                                                                                                                                                                                                                                                          | <b>Exclusion</b>                                                                                                                                                                                                                                                                         |
|---------------------|-------------------------------------------------------------------------------------------------------------------------------------------------------------------------------------------------------------------------------------------------------------------------------------------------------------------------------------------|------------------------------------------------------------------------------------------------------------------------------------------------------------------------------------------------------------------------------------------------------------------------------------------|
| <b>Population</b>   | <ul style="list-style-type: none"> <li>End-stage renal disease (Stage 5 CKD) patients undergoing hemodialysis;</li> </ul>                                                                                                                                                                                                                 | <ul style="list-style-type: none"> <li>Pediatric population (&lt;18 years old)</li> <li>Incident hemodialysis patients (&lt;1 month)</li> <li>Critically ill (ex: intensive care unit)</li> </ul>                                                                                        |
| <b>Intervention</b> | <ul style="list-style-type: none"> <li>Dialysis centre-base hemodialysis;</li> <li>Home-based hemodialysis</li> </ul>                                                                                                                                                                                                                     | <ul style="list-style-type: none"> <li>Peritoneal dialysis</li> <li>Non-standard hemodialysis settings (electrolyte concentrations of dialysate, temperature, etc.)</li> <li>Unrelated interventions such as nutritional, pharmaceutical and physical exercise interventions.</li> </ul> |
| <b>Outcome</b>      | <ul style="list-style-type: none"> <li>Functional indices of arterial stiffness: carotid-femoral PWV, carotid-radial PWV, brachial-ankle PWV, femoral-tibial PWV, cardio-ankle vascular index, pulse wave analysis (augmentation index and central pulse pressure), stiffness index, compliance and distensibility</li> </ul>             | <ul style="list-style-type: none"> <li>Peripheral pressure (brachial, finger, toe, etc.)</li> </ul>                                                                                                                                                                                      |
| <b>Study design</b> | <ul style="list-style-type: none"> <li>Repeated measures surrounding a single hemodialysis session.</li> <li>Randomized controlled and cross-over trials (if standard care group);</li> <li>Non-randomized prospective studies (before-and-after design).</li> <li>Articles in English, French, Italian and Spanish languages.</li> </ul> | <ul style="list-style-type: none"> <li>In-vitro or mathematical modeling reports;</li> <li>Case reports</li> <li>Animal studies;</li> <li>Sub-studies of previously reported trials;</li> <li>Narrative reviews;</li> <li>Duplicates.</li> </ul>                                         |

### Study screening and exclusions

An iterative process of study selection will be conducted using the inclusion and exclusion criteria detailed in *Table 1*. The study selection will be done by 2 pairs of independent reviewers, each pair

1  
2  
3 screening half of the records. In case of a disagreement between individual judgment, a third  
4 reviewer will decide. Decisions will be recorded in an Excel spreadsheet. First, citations will be  
5  
6 screened by title and abstract. After this first round of selection, materials and methods sections of  
7  
8 the selected articles will be screened to confirm the appropriateness of the study design and of the  
9  
10 arterial stiffness assessment method relative to the review question. Before data extraction, another  
11  
12 round of selection will be performed by both reviewers at the full-text level.  
13  
14  
15  
16  
17  
18

### 19 **Data extraction**

20  
21 A data extraction form will be prepared a-priori with consensus amongst the investigators.  
22  
23 Extracted data will include: a) **Study characteristics, design and methods**: title, first and last  
24  
25 author, journal and year of publication, research team or country where research was based,  
26  
27 language of publication, sources of funding, study design, inclusion and exclusion criteria, time  
28  
29 point measurements, type of arterial stiffness instrumentation, method used to identify the foot of  
30  
31 the pulse wave when applicable, position of subjects during measurements; b) **Sample**  
32  
33 **characteristics**: age at the time of measurement, sex distribution, HD vintage, comorbidities  
34  
35 (diabetes, hypertension, smoking status, prior history of cardiovascular disease), HD session  
36  
37 duration, electrolyte concentration of dialysate (calcium, magnesium), dialysis filter, volume  
38  
39 overload; c) **Outcomes**: peri and intra-dialytic changes in arterial stiffness based on the above-  
40  
41 mentioned methods (carotid-femoral PWV, carotid-radial PWV, brachial-ankle PWV, femoral-  
42  
43 tibial PWV, aortic and central pulse wave analysis (augmentation index and central pulse pressure),  
44  
45 stiffness index and local vascular distensibility, compliance and incremental elastic modulus, heart  
46  
47 rate, and arterial pressure. Study investigators will be contacted by email to gather unreported data  
48  
49 or additional details. Extraction of data will be done by two independent reviewers, on separate  
50  
51 Excel spreadsheet. Disagreements will be resolved by a third reviewer.  
52  
53  
54  
55  
56  
57  
58  
59  
60



## **Risk assessment of bias**

Internal validity of randomized controlled trials will be assessed using whether the Cochrane Collaboration Risk of Bias tool for randomized controlled trials, the ROBINS-I tool in the case of non-randomized studies, or the National Institutes of Health (NIH) quality assessment tool for before-after (Pre-Post) study without control group. Two reviewers will independently evaluate the possibility of bias in seven different domains including confounding factors (heart rate, mean arterial pressure, fluid removal by HD), selection of participants (unstable participants), classification of the intervention (hypotensive event-free), deviation from the intended intervention, missing data, measurement of outcomes (seated vs supine) and selection of the reported results. Each domain will be judged as either low, moderate, serious or critical risk of bias or no information available. An overall assessment of study bias summarizing all domains will be tabulated. A third reviewer will settle unresolved disagreements. In addition, information on the source of funding will be collected to assess conflicts of interest.

## **Data synthesis and analysis plan**

All studies fulfilling the eligibility criteria will be included in quantitative and qualitative synthesis. Study characteristics will be presented as means and standard deviation or median and inter-quartile ranges for continuous variables and numbers and percentages for categorical variables. For continuous data, an inverse variance method with random effect models will be used to pool the mean difference or standardized mean difference if studies reported different scales for the assessment of the same outcome. Dichotomous variables will be extracted from individual studies and combined using Mantel-Haenszel method with random effects models to pool relative risks. All analyses will be performed with RevMan 5.3 (Computer program, Version 5.3 Copenhagen:

1  
2  
3 The Nordic Cochrane Centre, The Cochrane Collaboration, 2014). Pooled effect sizes and their  
4  
5 95% confidence limits will be reported. If quantitative synthesis is not appropriate, studies will be  
6  
7 described individually according to intervention and outcomes reported in a summary table.  
8  
9

10  
11  
12 Between-study heterogeneity will be characterized with the Cochrane's  $I^2$  and will be interpreted  
13  
14 as low (0-30%), moderate (30-60%), and considerable >60%.  
15  
16

17  
18 A meta-regression is planned in case of a considerable heterogeneity among studies and if the  
19  
20 number of studies is sufficient (> 10 by covariate) [11]. Factors such as age of participants, HD  
21  
22 vintage, comorbidities (diabetes, heart failure, etc.), amount of liquid overload, heart rate, and mean  
23  
24 arterial pressure will be considered as covariates if adjusted outcomes are not available or  
25  
26 stratification has not been performed. These analyses will be performed using R (R Core Team  
27  
28 (2020). R: A language and environment for statistical computing. R Foundation for Statistical  
29  
30 Computing, Vienna, Austria) with the Metafor package (Viechtbauer W (2010). "Conducting meta-  
31  
32 analyses in R with the metafor package." Journal of Statistical Software, 36(3), 1–48.  
33  
34 <https://www.jstatsoft.org/v36/i03/>).  
35  
36  
37  
38  
39  
40  
41

### 42 **Sensitivity analysis**

43  
44 Sensitivity analysis according to study design and high risk of study bias will be performed to  
45  
46 explore sources of statistical heterogeneity.  
47  
48  
49  
50

### 51 **Subgroup analysis**

52  
53 Peripheral arterial segments are constituted of a higher proportion of vascular smooth muscle cells,  
54  
55 in contrast with the high elastin and collagen content of the aorta. Due to intravascular volume  
56  
57

1  
2  
3 correction and sympathetic activation at the end of a HD session, we hypothesized that PWV of  
4  
5 central large arteries and peripheral muscular arteries will not respond to the same extent despite  
6  
7 adjustments for arterial pressure and heart rate. Therefore, we plan to perform subgroup analysis  
8  
9 to pool data of PWV with respect elastic (aorta), muscular-medium sized arteries (carotid-radial  
10  
11 PWV, femoral-pedal PWV), and global PWV, which includes both elastic and muscular vessels  
12  
13 (brachial-ankle PWV, carotid-pedal PWV). We will also plan another subgroup analysis by pooling  
14  
15 regional PWV or local biomarkers of arterial stiffness depending on whether the information  
16  
17 involves elastic versus muscular vessels.  
18  
19  
20  
21  
22

### 23 **Meta-bias**

24  
25 We will attempt to avoid reporting bias by using a sensitive and reproducible search strategy,  
26  
27 including as many keywords and synonyms as possible. We will also assess the risk of publication  
28  
29 bias with funnel plots if at least 10 studies comparing the same group of treatment are included as  
30  
31 recommended by the Cochrane handbook [12].  
32  
33  
34  
35

### 36 **Quality of evidence**

37  
38 To assess the certainty of the evidence and strength of recommendations on the effects of a HD  
39  
40 session on arterial stiffness, 2 reviewers will evaluate quality of evidence for each outcome measure  
41  
42 according to the 5 domains of GRADE recommendations [13].  
43  
44  
45  
46

### 47 **Amendments**

48  
49 Any protocol amendments will be summarized in the form of a Table, where date of amendment,  
50  
51 description of changes and rationale will be provided.  
52  
53  
54  
55  
56  
57

## Patient and Public Involvement

Patients or the public were not involved in the design, or conduct, or reporting, or dissemination plans of this research.

## DISCUSSION

Patients with ESRD are at increased risk of aortic stiffness, a known non-traditional marker of cardiovascular morbidity and mortality. In this population, optimization of non-traditional risk factors may not be as effective in improving clinical outcomes compared to general population [14], highlighting the importance of addressing aortic stiffness and limiting its consequences, namely on end-organ damage. However, adequate risk prediction, and eventually intervention, requires that aortic stiffness be measured in a reliable and systematic way, which can be challenging in some clinical settings. Furthermore, there is still limited understanding of how measurements of vascular stiffness differ along the arterial tree [15], especially under conditions of hemodynamics stress, such as with HD.

Vascular stiffness assessment in ESRD patients is usually made in the pre-dialytic period to avoid having patients come in for clinical evaluation on their HD-free days. ESRD patients undergoing HD generally receive this intermittent treatment thrice weekly in clinical setting, few having the autonomy and/or support necessary for at-home HD. As a result, assessing aortic stiffness before or after HD appears as the most convenient timing. However, little is known as to the effect of the treatment itself on the reliability of vascular stiffness assessments, few studies having considered this issue, and generally with a small number of subjects.

Measurements and estimates of aortic stiffness are used as mechanical biomarkers in the clinical evaluation of ESRD patients. Pulse wave velocity based methodologies are most commonly and

1  
2  
3 reliably used to evaluate arterial stiffness, both in central elastic vessels (aorta, carotid artery) and  
4  
5 in more peripheral medium-sized muscular arteries (brachial, radial arteries). The pulse transit  
6  
7 times obtained with these methods reflect the stiffness of the arterial segment between  
8  
9 measurement sites. In addition, hemodynamic consequences of aortic stiffness can be evaluated  
10  
11 using analysis of aortic or otherwise central pulse pressure waveform morphology, whilst local  
12  
13 arterial mechanics (distensibility, compliance or incremental elastic modulus) can be evaluated in  
14  
15 a site-specific manner either at central or peripheral arterial sites [7].  
16  
17  
18  
19  
20  
21  
22

23 As described earlier, HD is not a physiological treatment. Its known effects on blood pressure,  
24  
25 intravascular volume, tissue perfusion and sympathetic nervous activation are likely to alter  
26  
27 measures and estimates of arterial stiffness, at the very least in some arterial segments [1, 16, 17].  
28  
29 Inconsistent methodologies and consequent findings not only obscure our understanding of the  
30  
31 determinants of vascular stiffness in ESRD, but may also hinder the predictive value of these  
32  
33 mechanical biomarkers when assessing cardiovascular risk in this population [18, 19]. This  
34  
35 proposed review aims to resolve these issues by evaluating the acute effect of HD on measurements  
36  
37 and estimates of vascular stiffness, and by suggesting the most appropriate, yet convenient, timing  
38  
39 for vascular stiffness assessment in ESRD.  
40  
41  
42  
43  
44  
45  
46

## 47 **CONCLUSIONS**

48  
49 End-stage renal disease patients are at high risk of cardiovascular morbidity and mortality, a risk  
50  
51 which is mediated in part by increased aortic stiffness, a non-traditional cardiovascular risk factor.  
52  
53 Various mechanical biomarkers are used to measure or estimate aortic and arterial stiffness.  
54  
55  
56  
57  
58  
59  
60

1  
2  
3 However, little is known of the robustness of each of these parameters under extreme hemodynamic  
4 conditions that occur during a hemodialysis treatment. Our review will provide a better  
5 understanding of the impact of hemodialysis on measures of aortic stiffness and provide the  
6 necessary evidence to recommend the most adequate timing of vascular assessment in ESRD  
7 patients.  
8  
9  
10  
11  
12  
13  
14  
15  
16  
17  
18  
19  
20  
21  
22  
23  
24  
25  
26  
27  
28  
29  
30  
31  
32  
33  
34  
35  
36  
37  
38  
39  
40  
41  
42  
43  
44  
45  
46  
47  
48  
49  
50  
51  
52  
53  
54  
55  
56  
57  
58  
59  
60

For peer review only

**REFERENCES**

1. Rubinger, D., R. Backenroth, and D. Sapoznikov, *Sympathetic nervous system function and dysfunction in chronic hemodialysis patients*. *Semin Dial*, 2013. **26**(3): p. 333-43.
2. Ronco, C. and W.R. Clark, *Haemodialysis membranes*. *Nat Rev Nephrol*, 2018. **14**(6): p. 394-410.
3. Locatelli, F., et al., *Optimizing haemodialysate composition*. *Clin Kidney J*, 2015. **8**(5): p. 580-9.
4. Sidibe, A., et al., *Reduction of Arterial Stiffness After Kidney Transplantation: A Systematic Review and Meta-Analysis*. *J Am Heart Assoc*, 2017. **6**(12).
5. Laurent, S., Boutouyrie P., Amsar R., Gautier I., Laloux B., Guize L., Ducimetière P., Benetos A., *Aortic Stiffness Is an Independent Predictor of All-Cause and Cardiovascular Mortality in Hypertensive Patients*. *Hypertension*, 2001. **37**: p. 1236-1241.
6. van de Velde, L., et al., *Myocardial preload alters central pressure augmentation through changes in the forward wave*. *J Hypertens*, 2018. **36**(3): p. 544-551.
7. Laurent, S., L. Marais, and P. Boutouyrie, *The Noninvasive Assessment of Vascular Aging*. *Can J Cardiol*, 2016. **32**(5): p. 669-79.
8. Zanolli, L., et al., *Increased carotid stiffness and remodelling at early stages of chronic kidney disease*. *J Hypertens*, 2019. **37**(6): p. 1176-1182.
9. Liberati, A., et al., *The PRISMA statement for reporting systematic reviews and meta-analyses of studies that evaluate healthcare interventions: explanation and elaboration*. *BMJ*, 2009. **339**: p. b2700.
10. Beller, E.M., et al., *PRISMA for Abstracts: reporting systematic reviews in journal and conference abstracts*. *PLoS Med*, 2013. **10**(4): p. e1001419.

11. Borenstein, J., *Responsible authorship in engineering fields: an overview of current ethical challenges*. *Sci Eng Ethics*, 2011. **17**(2): p. 355-64.
12. Egger M, Davey Smith G, Schneider M, Minder C. *Bias in meta-analysis detected by a simple, graphical test*. *BMJ*. 1997;315:629–34.
13. Guyatt G.H., O.A.D., Vist G.E., Kunz R., Falck-Ytter Y., Alonso-Coello P., Schünemann H.J., *GRADE: an emerging consensus on rating quality of evidence and strength of recommendations*. *BMJ*, 2008. **336**: p. 924-926.
14. van der Zee, S., et al., *Cardiovascular risk factors in patients with chronic kidney disease*. *Nat Rev Cardiol*, 2009. **6**(9): p. 580-9.
15. Fortier, C. and M. Agharazii, *Arterial Stiffness Gradient*. *Pulse (Basel)*, 2016. **3**(3-4): p. 159-66.
16. Marants, R., et al., *Renal Perfusion during Hemodialysis: Intradialytic Blood Flow Decline and Effects of Dialysate Cooling*. *J Am Soc Nephrol*, 2019. **30**(6): p. 1086-1095.
17. Assimon, M.M. and J.E. Flythe, *Intradialytic Blood Pressure Abnormalities: The Highs, The Lows and All That Lies Between*. *Am J Nephrol*, 2015. **42**(5): p. 337-50.
18. Bonarjee, V.V.S., *Arterial Stiffness: A Prognostic Marker in Coronary Heart Disease. Available Methods and Clinical Application*. *Front Cardiovasc Med*, 2018. **5**: p. 64.
19. Laurent, S., et al., *Expert consensus document on arterial stiffness: methodological issues and clinical applications*. *Eur Heart J*, 2006. **27**(21): p. 2588-605.



### Author statement

All authors contributed towards the submitted final manuscript. CF is a kinesiologist specialised in chronic kidney disease and postdoctoral researcher. MA is a nephrologist, the lead supervisor and corresponding author. PB is co-supervisor. CF, HO and MP drafted the initial manuscript and received guidance on content, methodology and analysis from AS and MA. MP and CAG are first reviewers, CF and HO are second reviewers. All authors have read and agreed the final manuscript.

### Funding

This research received no specific grant from any funding agency in the public, commercial or not-for-profit sectors.

### Conflicts of interests

Competing interests: None to declare

**Ethics and dissemination:** This study does not require ethical approval. Findings will be submitted for publication to relevant peer-reviewed journals and will be presented at profession-specific conferences.

### Technical appendix, statistical code, and dataset available from the Dryad repository

N/A

## **Appendix 1. Comprehensive Search Strategy for MEDLINE**

### **Mesh terms:**

#### ➤ **Population:**

- a) Chronic Renal or Kidney Failure
- b) End Stage Renal or Kidney Disease

#### ➤ **Intervention**

- c) Renal Dialysis; renal, extracorporeal
- d) Hemodialysis
- e) Home Hemodialysis
- f) Hemodialysis Solutions, Dialysate

#### ➤ **Comparator**

No restriction

#### ➤ **Outcomes**

### **Metrics of arterial stiffness:**

- g) Vascular stiffness, arterial stiffness, stiffness, aortic stiffness, carotid stiffness, central artery stiffness, large artery stiffness
- h) Stiffness, peripheral, small artery, brachial, femoral
- i) Carotid-femoral pulse wave velocity, carotid-radial pulse wave velocity, femoral-distal pulse wave velocity, pulse transit time,
- j) Brachial-ankle pulse wave velocity
- k) Augmentation index, Pulse wave analysis, central pulse pressure, pressure waveforms
- l) Distensibility, elasticity,
- m)  $\beta$ -stiffness, CAVI

Database: PubMed from inception to 2020 October 14.

### Search Strategy (Intervention AND Outcomes)

- 1 Kidney Failure, Chronic/ (94 073)
- 2 Renal Failure ti.ab.(90 187)
- 3 Kidney Failure ti.ab. (8 750)

- 1
- 2
- 3 4 (#2 or #3) AND chronic ti.ab.(35 520)
- 4 5 Renal disease\* ti.ab.(66 784)
- 5 6 Kidney disease\* ti.ab (86 384)
- 6 7 (OR #2, #3, #5, #6) AND End-Stage ti.ab. (44 753)
- 7 8 ESKD ti.ab (1 262)
- 8 9 ESRD ti.ab (16 791)
- 9 10 (OR #1, #4, #7, #8, #9) (131 528)
- 10 11 Renal Dialysis/ (114 412)
- 11 12 Dialysis ti.ab.OR Dialyses ti.ab.(110 444)
- 12 13 Renal ti.ab. AND #12 (43 530)
- 13 14 Extracorporeal ti.ab. AND #12 (1 657)
- 14 15 Hemodialys\* ti.ab.OR haemodialys\* ti.ab. (78 417)
- 15 16 Hemodialysis Solutions/ (1 606)
- 16 17 Hemodialysis, Home/ (1 943)
- 17 18 Dialysate ti.ab. (10 831)
- 18 19 (OR #11, #13, #14, #15, #16, #17, #18) (154 493)
- 19 20 Vascular Stiffness/ (6 198)
- 20 21 Pulse Wave Analysis/ (4 305)
- 21 22 Carotid-Femoral Pulse Wave Velocity/ (27)
- 22 23 Elastic Modulus/ (10 317)
- 23 24 Vascular Capacitance/ (287)
- 24 25 Cardio Ankle Vascular Index/ (18)
- 25 26 Carotid Intima-Media Thickness/ (5 028)
- 26 27 Vascular ti.ab. AND Stiffness ti.ab. (6 881)
- 27 28 Arter\* ti.ab. AND Stiffness ti.ab. (13 560)
- 28 29 Aort\* ti.ab. AND Stiffness ti.ab. (5 547)
- 29 30 Pulse wave velocit\* ti.ab (9 442)
- 30 31 Pulse wave analys\* ti.ab (1 199)
- 31 32 Pulse wave transit time\* ti.ab (98)
- 32 33 PWV ti.ab. (4 722)
- 33 34 Pulse transit time\* ti.ab. (626)
- 34 35 Carotid femoral pulse wave velocit\* ti.ab. (1 576)
- 35 36 Carotid femoral PWV ti.ab. (316)
- 36 37 CfPWV ti.ab. (254)
- 37 38 Carotid radial pulse wave velocit\* ti.ab. (108)
- 38 39 Carotid radial PWV ti.ab. (78)
- 39 40 Cr PWV ti.ab. (27)
- 40 41 Carotid brachial pulse wave velocit\* ti.ab. (5)
- 41 42 Carotid brachial PWV ti.ab. (5)
- 42 43 Cb PWV ti.ab. (1)
- 43 44 Brachial ankle pulse wave velocit\* ti.ab. (1 439)
- 44 45 Brachial ankle PWV ti.ab. (200)
- 45 46 ba PWV ti.ab. (118)
- 46 47 (aorta ti.ab.OR aortic ti.ab.) AND pulse wave velocit\* ti.ab. (3 481)
- 47 48 (aorta ti.ab.OR aortic ti.ab.) AND PWV ti.ab. (1 850)
- 48 49 Ao PWV ti.ab.(9)
- 49 50 Femoral ankle pulse wave velocit\* ti.ab. (10)
- 50
- 51
- 52
- 53
- 54
- 55
- 56
- 57
- 58
- 59
- 60

- 1  
2  
3 51 Femoral ankle PWV ti.ab. (22)  
4 52 Augmentation index ti.ab. (2 998)  
5 53 AIx ti.ab. (1493)  
6 54 Central pulse pressure ti.ab. OR central PP ti.ab. (489)  
7 55 aortic pulse pressure ti.ab. OR aortic PP ti.ab. (301)  
8 56 Elastic modulus ti.ab. (9 499)  
9 57 (Young ti.ab. OR young's ti.ab.) AND modulus ti.ab. (8 810)  
10 58 Vascular capacitance ti.ab. (186)  
11 59 Cardio ankle vascular index ti.ab. (584)  
12 60 CAVI ti.ab. (654)  
13 61 distensibility ti.ab. (4 626)  
14 62 arterial elasticity ti.ab.(519)  
15 63 stiffness index ti.ab. OR  $\beta$  stiffness ti.ab. (1 597)  
16 64 (OR #20-#64) (53 637)  
17  
18  
19  
20 64 (#19 AND #64) (1 081)  
21  
22  
23  
24 65 AND humans[filter] (987)  
25  
26  
27  
28  
29  
30  
31  
32  
33  
34  
35  
36  
37  
38  
39  
40  
41  
42  
43  
44  
45  
46  
47  
48  
49  
50  
51  
52  
53  
54  
55  
56  
57  
58  
59  
60

# Reporting checklist for protocol of a systematic review.

Based on the PRISMA-P guidelines.

## Instructions to authors

Complete this checklist by entering the page numbers from your manuscript where readers will find each of the items listed below.

Your article may not currently address all the items on the checklist. Please modify your text to include the missing information. If you are certain that an item does not apply, please write "n/a" and provide a short explanation.

Upload your completed checklist as an extra file when you submit to a journal.

In your methods section, say that you used the PRISMA-Reporting guidelines, and cite them as:

Moher D, Shamseer L, Clarke M, Ghersi D, Liberati A, Petticrew M, Shekelle P, Stewart LA. Preferred Reporting Items for Systematic Review and Meta-Analysis Protocols (PRISMA-P) 2015 statement. Syst Rev. 2015;4(1):1.

|                |                     |                                                                                    | Page   |
|----------------|---------------------|------------------------------------------------------------------------------------|--------|
|                |                     | Reporting Item                                                                     | Number |
| <b>Title</b>   |                     |                                                                                    |        |
| Identification | <a href="#">#1a</a> | Identify the report as a protocol of a systematic review                           | 1      |
| Update         | <a href="#">#1b</a> | If the protocol is for an update of a previous systematic review, identify as such | N/A    |

1 **Registration**  
2  
3

4 [#2](#) If registered, provide the name of the registry (such as 2  
5  
6 PROSPERO) and registration number  
7  
8  
9

10 **Authors**  
11

12  
13 **Contact** [#3a](#) Provide name, institutional affiliation, e-mail address of all 1  
14  
15 protocol authors; provide physical mailing address of  
16  
17 corresponding author  
18  
19

20 **Contribution** [#3b](#) Describe contributions of protocol authors and identify the 18  
21  
22 guarantor of the review  
23  
24

25 **Amendments**  
26  
27

28  
29 [#4](#) If the protocol represents an amendment of a previously N/A  
30  
31 completed or published protocol, identify as such and list  
32  
33 changes; otherwise, state plan for documenting important  
34  
35 protocol amendments  
36  
37  
38

39 **Support**  
40

41  
42 **Sources** [#5a](#) Indicate sources of financial or other support for the review 18  
43  
44

45 **Sponsor** [#5b](#) Provide name for the review funder and / or sponsor N/A  
46  
47

48 **Role of sponsor or** [#5c](#) Describe roles of funder(s), sponsor(s), and / or N/A  
49  
50 funder  
51 institution(s), if any, in developing the protocol  
52

53 **Introduction**  
54  
55  
56  
57  
58  
59  
60

|    |                      |                      |                                                                 |       |
|----|----------------------|----------------------|-----------------------------------------------------------------|-------|
| 1  | Rationale            | <a href="#">#6</a>   | Describe the rationale for the review in the context of what is | 4-5   |
| 2  |                      |                      | already known                                                   |       |
| 3  |                      |                      |                                                                 |       |
| 4  |                      |                      |                                                                 |       |
| 5  |                      |                      |                                                                 |       |
| 6  | Objectives           | <a href="#">#7</a>   | Provide an explicit statement of the question(s) the review     | 5-6   |
| 7  |                      |                      | will address with reference to participants, interventions,     |       |
| 8  |                      |                      | comparators, and outcomes (PICO)                                |       |
| 9  |                      |                      |                                                                 |       |
| 10 |                      |                      |                                                                 |       |
| 11 |                      |                      |                                                                 |       |
| 12 |                      |                      |                                                                 |       |
| 13 |                      |                      |                                                                 |       |
| 14 | <b>Methods</b>       |                      |                                                                 |       |
| 15 |                      |                      |                                                                 |       |
| 16 |                      |                      |                                                                 |       |
| 17 | Eligibility criteria | <a href="#">#8</a>   | Specify the study characteristics (such as PICO, study          | 6-7   |
| 18 |                      |                      | design, setting, time frame) and report characteristics (such   |       |
| 19 |                      |                      | as years considered, language, publication status) to be        |       |
| 20 |                      |                      | used as criteria for eligibility for the review                 |       |
| 21 |                      |                      |                                                                 |       |
| 22 |                      |                      |                                                                 |       |
| 23 |                      |                      |                                                                 |       |
| 24 |                      |                      |                                                                 |       |
| 25 |                      |                      |                                                                 |       |
| 26 |                      |                      |                                                                 |       |
| 27 | Information          | <a href="#">#9</a>   | Describe all intended information sources (such as              | 7     |
| 28 |                      |                      | electronic databases, contact with study authors, trial         |       |
| 29 | sources              |                      | registers or other grey literature sources) with planned dates  |       |
| 30 |                      |                      | of coverage                                                     |       |
| 31 |                      |                      |                                                                 |       |
| 32 |                      |                      |                                                                 |       |
| 33 |                      |                      |                                                                 |       |
| 34 |                      |                      |                                                                 |       |
| 35 |                      |                      |                                                                 |       |
| 36 |                      |                      |                                                                 |       |
| 37 | Search strategy      | <a href="#">#10</a>  | Present draft of search strategy to be used for at least one    | 19-21 |
| 38 |                      |                      | electronic database, including planned limits, such that it     |       |
| 39 |                      |                      | could be repeated                                               |       |
| 40 |                      |                      |                                                                 |       |
| 41 |                      |                      |                                                                 |       |
| 42 |                      |                      |                                                                 |       |
| 43 |                      |                      |                                                                 |       |
| 44 |                      |                      |                                                                 |       |
| 45 | Study records -      | <a href="#">#11a</a> | Describe the mechanism(s) that will be used to manage           | 9     |
| 46 |                      |                      | records and data throughout the review                          |       |
| 47 | data management      |                      |                                                                 |       |
| 48 |                      |                      |                                                                 |       |
| 49 |                      |                      |                                                                 |       |
| 50 | Study records -      | <a href="#">#11b</a> | State the process that will be used for selecting studies       | 8-10  |
| 51 |                      |                      | (such as two independent reviewers) through each phase of       |       |
| 52 | selection process    |                      | the review (that is, screening, eligibility and inclusion in    |       |
| 53 |                      |                      | meta-analysis)                                                  |       |
| 54 |                      |                      |                                                                 |       |
| 55 |                      |                      |                                                                 |       |
| 56 |                      |                      |                                                                 |       |
| 57 |                      |                      |                                                                 |       |
| 58 |                      |                      |                                                                 |       |
| 59 |                      |                      |                                                                 |       |
| 60 |                      |                      |                                                                 |       |

|    |                    |                      |                                                                                 |       |
|----|--------------------|----------------------|---------------------------------------------------------------------------------|-------|
| 1  | Study records -    | <a href="#">#11c</a> | Describe planned method of extracting data from reports                         | 9     |
| 2  |                    |                      |                                                                                 |       |
| 3  | data collection    |                      | (such as piloting forms, done independently, in duplicate),                     |       |
| 4  |                    |                      |                                                                                 |       |
| 5  | process            |                      | any processes for obtaining and confirming data from                            |       |
| 6  |                    |                      |                                                                                 |       |
| 7  |                    |                      | investigators                                                                   |       |
| 8  |                    |                      |                                                                                 |       |
| 9  |                    |                      |                                                                                 |       |
| 10 |                    |                      |                                                                                 |       |
| 11 | Data items         | <a href="#">#12</a>  | List and define all variables for which data will be sought                     | 9     |
| 12 |                    |                      |                                                                                 |       |
| 13 |                    |                      | (such as PICO items, funding sources), any pre-planned                          |       |
| 14 |                    |                      |                                                                                 |       |
| 15 |                    |                      | data assumptions and simplifications                                            |       |
| 16 |                    |                      |                                                                                 |       |
| 17 |                    |                      |                                                                                 |       |
| 18 |                    |                      |                                                                                 |       |
| 19 | Outcomes and       | <a href="#">#13</a>  | List and define all outcomes for which data will be sought,                     | 6-7   |
| 20 |                    |                      |                                                                                 |       |
| 21 | prioritization     |                      | including prioritization of main and additional outcomes, with                  |       |
| 22 |                    |                      |                                                                                 |       |
| 23 |                    |                      | rationale                                                                       |       |
| 24 |                    |                      |                                                                                 |       |
| 25 |                    |                      |                                                                                 |       |
| 26 | Risk of bias in    | <a href="#">#14</a>  | Describe anticipated methods for assessing risk of bias of                      | 10    |
| 27 |                    |                      |                                                                                 |       |
| 28 | individual studies |                      | individual studies, including whether this will be done at the                  |       |
| 29 |                    |                      |                                                                                 |       |
| 30 |                    |                      | outcome or study level, or both; state how this information                     |       |
| 31 |                    |                      |                                                                                 |       |
| 32 |                    |                      | will be used in data synthesis                                                  |       |
| 33 |                    |                      |                                                                                 |       |
| 34 |                    |                      |                                                                                 |       |
| 35 |                    |                      |                                                                                 |       |
| 36 | Data synthesis     | <a href="#">#15a</a> | Describe criteria under which study data will be                                | 10-11 |
| 37 |                    |                      |                                                                                 |       |
| 38 |                    |                      | quantitatively synthesised                                                      |       |
| 39 |                    |                      |                                                                                 |       |
| 40 |                    |                      |                                                                                 |       |
| 41 |                    |                      |                                                                                 |       |
| 42 | Data synthesis     | <a href="#">#15b</a> | If data are appropriate for quantitative synthesis, describe                    | 10-11 |
| 43 |                    |                      |                                                                                 |       |
| 44 |                    |                      | planned summary measures, methods of handling data and                          |       |
| 45 |                    |                      |                                                                                 |       |
| 46 |                    |                      | methods of combining data from studies, including any                           |       |
| 47 |                    |                      |                                                                                 |       |
| 48 |                    |                      | planned exploration of consistency (such as I <sup>2</sup> , Kendall's $\tau$ ) |       |
| 49 |                    |                      |                                                                                 |       |
| 50 |                    |                      |                                                                                 |       |
| 51 | Data synthesis     | <a href="#">#15c</a> | Describe any proposed additional analyses (such as                              | 10-11 |
| 52 |                    |                      |                                                                                 |       |
| 53 |                    |                      | sensitivity or subgroup analyses, meta-regression)                              |       |
| 54 |                    |                      |                                                                                 |       |
| 55 |                    |                      |                                                                                 |       |
| 56 |                    |                      |                                                                                 |       |
| 57 |                    |                      |                                                                                 |       |
| 58 |                    |                      |                                                                                 |       |
| 59 |                    |                      |                                                                                 |       |
| 60 |                    |                      |                                                                                 |       |



|    |                |                      |                                                                 |       |
|----|----------------|----------------------|-----------------------------------------------------------------|-------|
| 1  | Data synthesis | <a href="#">#15d</a> | If quantitative synthesis is not appropriate, describe the type | 11-12 |
| 2  |                |                      |                                                                 |       |
| 3  |                |                      | of summary planned                                              |       |
| 4  |                |                      |                                                                 |       |
| 5  |                |                      |                                                                 |       |
| 6  | Meta-bias(es)  | <a href="#">#16</a>  | Specify any planned assessment of meta-bias(es) (such as        | 12    |
| 7  |                |                      | publication bias across studies, selective reporting within     |       |
| 8  |                |                      |                                                                 |       |
| 9  |                |                      | studies)                                                        |       |
| 10 |                |                      |                                                                 |       |
| 11 |                |                      |                                                                 |       |
| 12 |                |                      |                                                                 |       |
| 13 |                |                      |                                                                 |       |
| 14 | Confidence in  | <a href="#">#17</a>  | Describe how the strength of the body of evidence will be       | 12    |
| 15 | cumulative     |                      | assessed (such as GRADE)                                        |       |
| 16 |                |                      |                                                                 |       |
| 17 | evidence       |                      |                                                                 |       |
| 18 |                |                      |                                                                 |       |
| 19 |                |                      |                                                                 |       |
| 20 |                |                      |                                                                 |       |
| 21 |                |                      |                                                                 |       |

22 None The PRISMA-P checklist is distributed under the terms of the Creative Commons Attribution  
23 License CC-BY 4.0. This checklist can be completed online using <https://www.goodreports.org/>, a tool  
24 made by the [EQUATOR Network](#) in collaboration with [Penelope.ai](#)  
25  
26  
27  
28  
29  
30  
31  
32  
33  
34  
35  
36  
37  
38  
39  
40  
41  
42  
43  
44  
45  
46  
47  
48  
49  
50  
51  
52  
53  
54  
55  
56  
57  
58  
59  
60

# BMJ Open

## Changes in arterial stiffness indices during a single hemodialysis session in end-stage renal disease population -- A systematic review and meta-analysis protocol

|                                 |                                                                                                                                                                                                                                                                                                                                                                                                                                                                                                                                                                                                                                                                                                                                                                                                                                                                                                                                                                                                                                                                |
|---------------------------------|----------------------------------------------------------------------------------------------------------------------------------------------------------------------------------------------------------------------------------------------------------------------------------------------------------------------------------------------------------------------------------------------------------------------------------------------------------------------------------------------------------------------------------------------------------------------------------------------------------------------------------------------------------------------------------------------------------------------------------------------------------------------------------------------------------------------------------------------------------------------------------------------------------------------------------------------------------------------------------------------------------------------------------------------------------------|
| Journal:                        | <i>BMJ Open</i>                                                                                                                                                                                                                                                                                                                                                                                                                                                                                                                                                                                                                                                                                                                                                                                                                                                                                                                                                                                                                                                |
| Manuscript ID                   | bmjopen-2020-045912.R2                                                                                                                                                                                                                                                                                                                                                                                                                                                                                                                                                                                                                                                                                                                                                                                                                                                                                                                                                                                                                                         |
| Article Type:                   | Protocol                                                                                                                                                                                                                                                                                                                                                                                                                                                                                                                                                                                                                                                                                                                                                                                                                                                                                                                                                                                                                                                       |
| Date Submitted by the Author:   | 07-Jul-2021                                                                                                                                                                                                                                                                                                                                                                                                                                                                                                                                                                                                                                                                                                                                                                                                                                                                                                                                                                                                                                                    |
| Complete List of Authors:       | Fortier, Catherine; INSERM U970, Paris Cardiovascular Research Center (PARCC), Team 7; CHU de Québec-Université Laval, Research Center-L'Hôtel-Dieu de Québec, Division of Nephrology<br>Obeid, Hasan; CHU de Québec-Université Laval, Research Center-L'Hôtel-Dieu de Québec, Division of Nephrology<br>Paré, Mathilde; CHU de Québec-Université Laval, Research Center-L'Hôtel-Dieu de Québec, Division of Nephrology<br>Garneau, Charles-Antoine; CHU de Québec-Université Laval, Research Center-L'Hôtel-Dieu de Québec, Division of Nephrology<br>Sidibé, Aboubacar; CHU de Québec-Université Laval, Research Center-L'Hôtel-Dieu de Québec, Division of Nephrology<br>Boutouyrie, Pierre; INSERM U970, Paris Cardiovascular Research Center (PARCC), Team 7; APHP, Pharmacology Unit, Hôpital Européen Georges Pompidou, Université de Paris<br>Agharazii, Mohsen; CHU de Québec-Université Laval, Research Center-L'Hôtel-Dieu de Québec, Division of Nephrology; Université Laval Faculté de médecine, Department of medicine, Division of Nephrology. |
| <b>Primary Subject Heading</b>: | Renal medicine                                                                                                                                                                                                                                                                                                                                                                                                                                                                                                                                                                                                                                                                                                                                                                                                                                                                                                                                                                                                                                                 |
| Secondary Subject Heading:      | Cardiovascular medicine                                                                                                                                                                                                                                                                                                                                                                                                                                                                                                                                                                                                                                                                                                                                                                                                                                                                                                                                                                                                                                        |
| Keywords:                       | Dialysis < NEPHROLOGY, End stage renal failure < NEPHROLOGY, Hypertension < CARDIOLOGY, CLINICAL PHYSIOLOGY                                                                                                                                                                                                                                                                                                                                                                                                                                                                                                                                                                                                                                                                                                                                                                                                                                                                                                                                                    |
|                                 |                                                                                                                                                                                                                                                                                                                                                                                                                                                                                                                                                                                                                                                                                                                                                                                                                                                                                                                                                                                                                                                                |

SCHOLARONE™  
Manuscripts

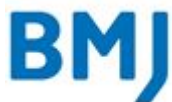

I, the Submitting Author has the right to grant and does grant on behalf of all authors of the Work (as defined in the below author licence), an exclusive licence and/or a non-exclusive licence for contributions from authors who are: i) UK Crown employees; ii) where BMJ has agreed a CC-BY licence shall apply, and/or iii) in accordance with the terms applicable for US Federal Government officers or employees acting as part of their official duties; on a worldwide, perpetual, irrevocable, royalty-free basis to BMJ Publishing Group Ltd ("BMJ") its licensees and where the relevant Journal is co-owned by BMJ to the co-owners of the Journal, to publish the Work in this journal and any other BMJ products and to exploit all rights, as set out in our [licence](#).

The Submitting Author accepts and understands that any supply made under these terms is made by BMJ to the Submitting Author unless you are acting as an employee on behalf of your employer or a postgraduate student of an affiliated institution which is paying any applicable article publishing charge ("APC") for Open Access articles. Where the Submitting Author wishes to make the Work available on an Open Access basis (and intends to pay the relevant APC), the terms of reuse of such Open Access shall be governed by a Creative Commons licence – details of these licences and which [Creative Commons](#) licence will apply to this Work are set out in our licence referred to above.

Other than as permitted in any relevant BMJ Author's Self Archiving Policies, I confirm this Work has not been accepted for publication elsewhere, is not being considered for publication elsewhere and does not duplicate material already published. I confirm all authors consent to publication of this Work and authorise the granting of this licence.

1  
2  
3 **Changes in arterial stiffness indices during a single hemodialysis session in end-stage renal**  
4 **disease population -- A systematic review and meta-analysis protocol**  
5  
6  
7

8 Authors: Catherine FORTIER<sup>1,2</sup>, Hasan OBEID<sup>2</sup>, Mathilde PARÉ<sup>2</sup>, Charles-Antoine  
9 GARNEAU<sup>2</sup>, Aboubacar SIDIBÉ<sup>2</sup>, Pierre BOUTOUYRIE<sup>1,3</sup>, Mohsen AGHARAZII<sup>2,4</sup>.  
10  
11

12  
13 <sup>1</sup> INSERM U970, Paris Cardiovascular Research Center (PARCC), Team 7, Paris, France.  
14

15 <sup>2</sup> CHU de Québec-Université Laval Research Center-L'Hôtel-Dieu de Québec, Division of  
16 Nephrology, Québec, Québec, Canada.  
17

18 <sup>3</sup> APHP, Pharmacology Unit, Hôpital Européen Georges Pompidou, Université de Paris, Paris,  
19 Île-de-France, France.  
20

21 <sup>4</sup> Université Laval Faculté de médecine, Department of medicine, Division of Nephrology,  
22 Québec, Québec, Canada.  
23  
24

25  
26 catherine.fortier@inserm.fr  
27

28 hasan.obeid@crchudequebec.ulaval.ca  
29

30 mathilde.pare.1@ulaval.ca  
31

32 charles-antoine.garneau.2@ulaval.ca  
33

34 aboubacar.sidibe.1@ulaval.ca  
35

36 pierre.boutouyrie@aphp.fr  
37  
38  
39

40 **Word Count:** 2 498 words  
41

42 **Corresponding author:**

43 Mohsen Agharazii, MD

44 CHU de Québec-Université Laval

45 Research Center-L'Hôtel-Dieu de Québec

46 Division of Nephrology  
47

48 11, Côte du Palais,  
49 Québec, Québec, Canada

50 G1R 2J6

51

52 Tél: 418-691-5464

53 Fax: 418-691-5562

54 [mohsen.agharazii@crchudequebec.ulaval.ca](mailto:mohsen.agharazii@crchudequebec.ulaval.ca)  
55  
56  
57  
58  
59  
60

## ABSTRACT

**Introduction:** End-stage renal disease patients are at higher risk of cardiovascular morbidity and mortality, a risk mediated in part by increased aortic stiffness. Arterial stiffness is assessed at different anatomical locations (central elastic or peripheral muscular arteries) using a variety of mechanical biomarkers. However, little is known on the robustness of each of these mechanical biomarkers following a hemodynamic stress caused by a single hemodialysis session.

**Methods and analysis:** A systematic review has been designed and reported in accordance with the Preferred Reporting Items for Systematic review and Meta-Analysis Protocols. A targeted search strategy applicable in key databases (PubMed, Embase, the Cochrane Library, Web of Science and grey literature) is constructed to search articles and reviews from inception to October 16<sup>th</sup> 2020. Only articles of studies conducted with adults under chronic hemodialysis for kidney failure, with repeated measures of arterial stiffness metrics (pulse wave velocity, augmentation index, arterial distensibility or stiffness) following a before-and-after design surrounding a hemodialysis session will be selected. The screening process, data extraction and assessment of risk bias (ROBINS-I tool) will be done by two independent pairs of reviewers. Meta-analysis will enable adjustments for potential confounders and subgroup analyses will be performed to discriminate changes in arterial stiffness metrics from elastic, muscular or global arterial territories.

**Ethics and dissemination:** This study does not require ethical approval. Findings will be submitted for publication to relevant peer-reviewed journals and will be presented at profession-specific conferences.

**Prospero registration number: CRD42020213946**

1  
2  
3 **Keywords:** hemodialysis, end-stage renal disease, arterial stiffness, pulse wave velocity, PWV,  
4 pulse wave analysis, augmentation index, central pulse pressure, distensibility, arterial compliance.  
5  
6  
7  
8  
9  
10

## 11 **ARTICLE SUMMARY**

### 12 **Strengths and limitations of this study**

- 13  
14  
15  
16  
17 • Selection of before-and-after design studies will enable a better comprehension of the effect  
18 of hemodynamic stress that occurs during hemodialysis session on arterial mechanical  
19 properties.  
20  
21
- 22  
23 • Subgroup analysis according to site of blood vessels (central elastic vs. peripheral  
24 muscular) is a relevant approach to explain discrepancies of arterial stiffness changes during  
25 hemodialysis, as large elastic and medium-sized muscular arteries may behave differently  
26 during excess liquid removal and sympathetic activation.  
27  
28
- 29 • Meta-regression will help assessing the extent of the impact of potential clinical and  
30 hemodynamic confounders on the different arterial stiffness indices during a hemodialysis  
31 session  
32  
33
- 34 • Implementing well-validated scales for the assessment of risk of bias and certainty of  
35 evidence will minimize misinterpretation.  
36  
37
- 38 • Potential diversity and heterogeneity of arterial stiffness markers may limit quantitative  
39 analyses.  
40  
41  
42  
43  
44  
45  
46  
47  
48  
49  
50  
51  
52  
53  
54  
55  
56  
57  
58  
59  
60

## INTRODUCTION

Hemodialysis (HD) is the most common treatment for patients with end-stage renal disease (ESRD). Its intermittent regimen, usually thrice weekly, leads to inexorable retention of solutes, toxins, and excess volume during the interdialytic period (2-3 days), which are partially corrected during the subsequent HD (i.e. usually 4 hours). Despite its vital role, HD is not a physiological treatment. A high ultrafiltration rate during this short period reduces intravascular blood volume leading to a decrease in blood pressure and coronary flow, hypoperfusion of vital vascular beds, and reflex activation of sympathetic nervous system which causes tachycardia [1]. Moreover, during HD, the dialysis membrane is a site where blood has substantial contact with non-biological material, activating white blood cells and their downstream biological reactions which involve activation of complement alternative pathway [2-3]. In addition, electrolyte composition of dialysis solution may alter cardiovascular response through the acute changes in serum calcium and magnesium concentrations [4-5].

Patients with chronic kidney disease are at increased risk of aortic stiffness through various biological processes [6]. Aortic stiffness is a non-traditional mechanical biomarker of cardiovascular morbidity and mortality [7-9], which increases cardiac workload and pulse pressure transmission along the arterial tree. Classically, aortic stiffness is evaluated non-invasively by measuring or estimating carotid-femoral pulse wave velocity (PWV). Other methods aim to quantify the hemodynamic consequences of aortic stiffness through analysis of aortic pulse pressure waveform morphology and determination of central augmentation index (AIx) as a measure of pressure wave reflection [10-11]. There are also other systems that use heart-ankle PWV or brachial-ankle PWV which incorporates not only the stiffness of aorta (central elastic vessel), but also the stiffness of medium-sized muscular vessels [12-13]. It is also possible to study

1  
2  
3 local arterial stiffness [14], for example, by studying pressure-diameter relationship throughout the  
4 cardiac cycle for arteries such as the common carotid artery (elastic) or radial artery (muscular).  
5  
6 Due to the heterogeneity of the arterial wall composition and dimension, various vascular segments  
7  
8 behave differently in response to pathological conditions, volume status, blood pressure, heart rate,  
9  
10 and sympathetic nervous activity. To what extent a single session of HD affects these  
11  
12 measurements is not only important scientifically, but also clinically. Inconsistent methodologies  
13  
14 and consequent findings not only obscure our understanding of the determinants of vascular  
15  
16 stiffness in ESRD, but may also hinder the predictive value of these mechanical biomarkers when  
17  
18 assessing cardiovascular risk in this population [15, 16]. Finally, studies addressing this question  
19  
20 are scarce, and usually include a small number of subjects, which could hamper the reliability of  
21  
22 their conclusions. Therefore, we propose to conduct a systematic review and a meta-analysis to  
23  
24 estimate the impact of a single session of HD on markers of arterial stiffness in an attempt to  
25  
26 recommend the best timing of measurement with respect to HD. If possible, we will examine  
27  
28 whether all vascular segments and markers of arterial stiffness point towards the same conclusion.  
29  
30 Whilst pursuing these goals, this review will highlight the strengths and weaknesses of the reported  
31  
32 studies, and determine if there is a need for further well-designed investigations.  
33  
34  
35  
36  
37  
38  
39  
40  
41  
42

### 43 **Objectives**

44  
45 The major objective of this review is to determine the acute effect of a single HD session on  
46  
47 mechanical biomarkers of arterial stiffness including: carotid-femoral PWV, carotid-radial PWV,  
48  
49 brachial-ankle PWV, femoral-tibial PWV, aortic pulse wave analysis, central pulse wave analysis  
50  
51 (augmentation index and central pulse pressure), aortic/carotid/femoral/radial distension metrics,  
52  
53 compliance or incremental elastic modulus.  
54  
55  
56  
57



## METHODS

### Design

We will conduct this systematic review and meta-analysis in accordance with this predefined protocol which is reported in line with the Preferred Reporting Items for Systematic Reviews and Meta Analyses Protocols (PRISMA-P) checklist [17, 18].

### Population and eligibility criteria

In this review, we will include all studies conducted amongst adult patients ( $\geq 18$  years old) with ESRD undergoing chronic HD, either in hospital setting or at home.

### Intervention

In this review, a single HD session will be considered as the main intervention.

### Outcomes

The primary outcome will be the change in arterial stiffness using PWV-based measurements. Pulse wave velocity is the most widely accepted and used method to measure arterial stiffness by determination of pulse transit time between two points over an arterial segment (m/s). Arterial segments may include central large elastic and peripheral muscular arteries in different proportions such as carotid-femoral PWV, estimated aortic PWV, brachial-ankle PWV, carotid-radial PWV, femoral-distal PWV.

Secondary outcomes will be based on biomarkers of arterial stiffness such central pulse pressure, central augmentation index, arterial distensibility, compliance and incremental elastic modulus of

1  
2  
3 aorta, carotid, femoral and radial arteries. We will report absolute values as well as between-group  
4  
5 mean differences in their respective units of measurement per biomarker.  
6  
7  
8  
9  
10

## 11 **Study design**

12  
13 We will include all observational studies with repeated measures of arterial stiffness or central  
14  
15 pressure with a before-and-after design surrounding a HD session. In the case of interventional  
16  
17 studies, the values of the reference group (standard care) will be used in the analysis. We will  
18  
19 exclude non-human studies, narrative reviews, in-vitro or mathematical modeling reports.  
20  
21 Duplicate or sub-study of previously published investigations will be removed.  
22  
23  
24  
25  
26

## 27 **Search Strategy**

28  
29 Our search strategy includes bibliographic databases (PubMed, Embase, The Cochrane Library and  
30  
31 Web of Science), references lists of eligible studies and review articles, trials registers and grey  
32  
33 literature from inception to October 16<sup>th</sup> 2020. MeSH terms will be used to target articles relevant  
34  
35 to the research question. Our proposed literature search strategy is outlined in *Appendix 1*. Manual  
36  
37 screening of the reference list will be conducted based on pre-defined criteria listed in *Table 1*. No  
38  
39 language restrictions or publication period will be imposed on the initial searches; however, our  
40  
41 final analysis will be limited to articles originally reported in English, French, Italian and Spanish.  
42  
43 Searches will be re-run just before the final analyses and any further identified studies will be  
44  
45 retrieved for inclusion. Unpublished studies will not be sought. Duplicate citations will be removed.  
46  
47  
48  
49  
50  
51  
52  
53  
54  
55  
56  
57  
58  
59  
60

**Table 1.** List of inclusion and exclusion criteria for study selection

|                     | <b>Inclusion</b>                                                                                                                                                                                                                                                                                                                          | <b>Exclusion</b>                                                                                                                                                                                                                                                                         |
|---------------------|-------------------------------------------------------------------------------------------------------------------------------------------------------------------------------------------------------------------------------------------------------------------------------------------------------------------------------------------|------------------------------------------------------------------------------------------------------------------------------------------------------------------------------------------------------------------------------------------------------------------------------------------|
| <b>Population</b>   | <ul style="list-style-type: none"> <li>End-stage renal disease (Stage 5 CKD) patients undergoing hemodialysis;</li> </ul>                                                                                                                                                                                                                 | <ul style="list-style-type: none"> <li>Pediatric population (&lt;18 years old)</li> <li>Incident hemodialysis patients (&lt;1 month)</li> <li>Critically ill (ex: intensive care unit)</li> </ul>                                                                                        |
| <b>Intervention</b> | <ul style="list-style-type: none"> <li>Dialysis centre-base hemodialysis;</li> <li>Home-based hemodialysis</li> </ul>                                                                                                                                                                                                                     | <ul style="list-style-type: none"> <li>Peritoneal dialysis</li> <li>Non-standard hemodialysis settings (electrolyte concentrations of dialysate, temperature, etc.)</li> <li>Unrelated interventions such as nutritional, pharmaceutical and physical exercise interventions.</li> </ul> |
| <b>Outcome</b>      | <ul style="list-style-type: none"> <li>Functional indices of arterial stiffness: carotid-femoral PWV, carotid-radial PWV, brachial-ankle PWV, femoral-tibial PWV, cardio-ankle vascular index, pulse wave analysis (augmentation index and central pulse pressure), stiffness index, compliance and distensibility</li> </ul>             | <ul style="list-style-type: none"> <li>Peripheral pressure (brachial, finger, toe, etc.)</li> </ul>                                                                                                                                                                                      |
| <b>Study design</b> | <ul style="list-style-type: none"> <li>Repeated measures surrounding a single hemodialysis session.</li> <li>Randomized controlled and cross-over trials (if standard care group);</li> <li>Non-randomized prospective studies (before-and-after design).</li> <li>Articles in English, French, Italian and Spanish languages.</li> </ul> | <ul style="list-style-type: none"> <li>In-vitro or mathematical modeling reports;</li> <li>Case reports</li> <li>Animal studies;</li> <li>Sub-studies of previously reported trials;</li> <li>Narrative reviews;</li> <li>Duplicates.</li> </ul>                                         |

### Study screening and exclusions

An iterative process of study selection will be conducted using the inclusion and exclusion criteria detailed in *Table 1*. The study selection will be done by 2 pairs of independent reviewers, each pair

1  
2  
3 screening half of the records. In case of a disagreement between individual judgment, a third  
4 reviewer will decide. Decisions will be recorded in an Excel spreadsheet. First, citations will be  
5 screened by title and abstract. After this first round of selection, materials and methods sections of  
6 the selected articles will be screened to confirm the appropriateness of the study design and of the  
7 arterial stiffness assessment method relative to the review question. Before data extraction, another  
8 round of selection will be performed by both reviewers at the full-text level.  
9  
10  
11  
12  
13  
14  
15  
16  
17  
18

### 19 **Data extraction**

20  
21 A data extraction form will be prepared a-priori with consensus amongst the investigators.  
22  
23 Extracted data will include: a) **Study characteristics, design and methods**: title, first and last  
24 author, journal and year of publication, research team or country where research was based,  
25 language of publication, sources of funding, study design, inclusion and exclusion criteria, time  
26 point measurements, type of arterial stiffness instrumentation, method used to identify the foot of  
27 the pulse wave when applicable, position of subjects during measurements; b) **Sample**  
28 **characteristics**: age at the time of measurement, sex distribution, HD vintage, comorbidities  
29 (diabetes, hypertension, smoking status, prior history of cardiovascular disease), HD session  
30 duration, electrolyte concentration of dialysate (calcium, magnesium), dialysis filter, volume  
31 overload; c) **Outcomes**: peri and intra-dialytic changes in arterial stiffness based on the above-  
32 mentioned methods (carotid-femoral PWV, carotid-radial PWV, brachial-ankle PWV, femoral-  
33 tibial PWV, aortic and central pulse wave analysis (augmentation index and central pulse pressure),  
34 stiffness index and local vascular distensibility, compliance and incremental elastic modulus, heart  
35 rate, and arterial pressure. Study investigators will be contacted by email to gather unreported data  
36 or additional details. Extraction of data will be done by two independent reviewers, on separate  
37 Excel spreadsheet. Disagreements will be resolved by a third reviewer.  
38  
39  
40  
41  
42  
43  
44  
45  
46  
47  
48  
49  
50  
51  
52  
53  
54  
55  
56  
57

### **Risk assessment of bias**

Internal validity of randomized controlled trials will be assessed using whether the Cochrane Collaboration Risk of Bias tool for randomized controlled trials, the ROBINS-I tool in the case of non-randomized studies, or the National Institutes of Health (NIH) quality assessment tool for before-after (Pre-Post) study without control group. Two reviewers will independently evaluate the possibility of bias in seven different domains including confounding factors (heart rate, mean arterial pressure, fluid removal by HD), selection of participants (unstable participants), classification of the intervention (hypotensive event-free), deviation from the intended intervention, missing data, measurement of outcomes (seated vs supine) and selection of the reported results. Each domain will be judged as either low, moderate, serious or critical risk of bias or no information available. An overall assessment of study bias summarizing all domains will be tabulated. A third reviewer will settle unresolved disagreements. In addition, information on the source of funding will be collected to assess conflicts of interest.

### **Data synthesis and analysis plan**

All studies fulfilling the eligibility criteria will be included in quantitative and qualitative synthesis. Study characteristics will be presented as means and standard deviation or median and inter-quartile ranges for continuous variables and numbers and percentages for categorical variables. For continuous data, an inverse variance method with random effect models will be used to pool the mean difference or standardized mean difference if studies reported different scales for the assessment of the same outcome. Dichotomous variables will be extracted from individual studies and combined using Mantel-Haenszel method with random effects models to pool relative risks. All analyses will be performed with RevMan 5.3 (Computer program, Version 5.3 Copenhagen:

1  
2  
3 The Nordic Cochrane Centre, The Cochrane Collaboration, 2014). Pooled effect sizes and their  
4  
5 95% confidence limits will be reported. If quantitative synthesis is not appropriate, studies will be  
6  
7 described individually according to intervention and outcomes reported in a summary table.  
8  
9

10  
11  
12 Between-study heterogeneity will be characterized with the Cochrane's  $I^2$  and will be interpreted  
13  
14 as low (0-30%), moderate (30-60%), and considerable >60%.  
15  
16

17  
18 A meta-regression is planned in case of a considerable heterogeneity among studies and if the  
19  
20 number of studies is sufficient (> 10 by covariate) [18]. Factors such as age of participants, HD  
21  
22 vintage, comorbidities (diabetes, heart failure, etc.), amount of liquid overload, heart rate, and mean  
23  
24 arterial pressure will be considered as covariates if adjusted outcomes are not available or  
25  
26 stratification has not been performed. These analyses will be performed using R (R Core Team  
27  
28 (2020). R: A language and environment for statistical computing. R Foundation for Statistical  
29  
30 Computing, Vienna, Austria) with the Metafor package (Viechtbauer W (2010). "Conducting meta-  
31  
32 analyses in R with the metafor package." Journal of Statistical Software, 36(3), 1–48.  
33  
34 <https://www.jstatsoft.org/v36/i03/>).  
35  
36  
37  
38  
39  
40  
41

### 42 **Sensitivity analysis**

43  
44 Sensitivity analysis according to study design and high risk of study bias will be performed to  
45  
46 explore sources of statistical heterogeneity.  
47  
48  
49  
50

### 51 **Subgroup analysis**

52  
53 Peripheral arterial segments are constituted of a higher proportion of vascular smooth muscle cells,  
54  
55 in contrast with the high elastin and collagen content of the aorta. Due to intravascular volume  
56  
57

1  
2  
3 correction and sympathetic activation at the end of a HD session, we hypothesized that PWV of  
4  
5 central large arteries and peripheral muscular arteries will not respond to the same extent despite  
6  
7 adjustments for arterial pressure and heart rate. Therefore, we plan to perform subgroup analysis  
8  
9 to pool data of PWV with respect elastic (aorta), muscular-medium sized arteries (carotid-radial  
10  
11 PWV, femoral-pedal PWV), and global PWV, which includes both elastic and muscular vessels  
12  
13 (brachial-ankle PWV, carotid-pedal PWV). We will also plan another subgroup analysis by pooling  
14  
15 regional PWV or local biomarkers of arterial stiffness depending on whether the information  
16  
17 involves elastic versus muscular vessels.  
18  
19  
20  
21  
22  
23

#### 24 **Meta-bias**

25  
26 We will attempt to avoid reporting bias by using a sensitive and reproducible search strategy,  
27  
28 including as many keywords and synonyms as possible. We will also assess the risk of publication  
29  
30 bias with funnel plots if at least 10 studies comparing the same group of treatment are included as  
31  
32 recommended by the Cochrane handbook [19].  
33  
34  
35

#### 36 **Quality of evidence**

37  
38 To assess the certainty of the evidence and strength of recommendations on the effects of a HD  
39  
40 session on arterial stiffness, 2 reviewers will evaluate quality of evidence for each outcome measure  
41  
42 according to the 5 domains of GRADE recommendations [20].  
43  
44  
45  
46

#### 47 **Amendments**

48  
49 Any protocol amendments will be summarized in the form of a Table, where date of amendment,  
50  
51 description of changes and rationale will be provided.  
52  
53  
54  
55  
56  
57

### **Patient and Public Involvement**

Patients or the public were not involved in the design, or conduct, or reporting, or dissemination plans of this research.

**Ethics and dissemination:** This study does not require ethical approval. Findings will be submitted for publication to relevant peer-reviewed journals and will be presented at profession-specific conferences.

### **CONCLUSIONS**

End-stage renal disease patients are at high risk of cardiovascular morbidity and mortality, a risk which is mediated in part by increased aortic stiffness, a non-traditional cardiovascular risk factor. Various mechanical biomarkers are used to measure or estimate aortic and arterial stiffness. However, little is known of the robustness of each of these parameters under extreme hemodynamic conditions that occur during a hemodialysis treatment. Our review will provide a better understanding of the impact of hemodialysis on measures of aortic stiffness and provide the necessary evidence to recommend the most adequate timing of vascular assessment in ESRD patients.



**REFERENCES**

1. Rubinger D, Backenroth R, Sapoznikov D. Sympathetic nervous system function and dysfunction in chronic hemodialysis patients. *Semin Dial.* 2013;26(3):333-43.
2. Ronco C, Clark WR. Haemodialysis membranes. *Nat Rev Nephrol.* 2018;14(6):394-410.
3. Koga Y, Fujieda H, Meguro H, Ueno Y, Aoki T, Miwa K, et al. Biocompatibility of Polysulfone Hemodialysis Membranes and Its Mechanisms: Involvement of Fibrinogen and Its Integrin Receptors in Activation of Platelets and Neutrophils. *Artif Organs.* 2018;42(9):E246-E58.
4. Locatelli F, La Milia V, Violo L, Del Vecchio L, Di Filippo S. Optimizing haemodialysate composition. *Clin Kidney J.* 2015;8(5):580-9.
5. Mac-Way F, Leboeuf A, Agharazii M. Arterial stiffness and dialysis calcium concentration. *Int J Nephrol.* 2011;2011:839793.
6. Zanolli L, Lentini P, Briet M, Castellino P, House AA, London GM, et al. Arterial Stiffness in the Heart Disease of CKD. *J Am Soc Nephrol.* 2019;30(6):918-28.
7. Laurent S, Boutouyrie P, Asmar R, Gautier I, Laloux B, Guize L, et al. Aortic stiffness is an independent predictor of all-cause and cardiovascular mortality in hypertensive patients. *Hypertension.* 2001;37(5):1236-41.
8. Guerin AP, Pannier B, Metivier F, Marchais SJ, London GM. Assessment and significance of arterial stiffness in patients with chronic kidney disease. *Curr Opin Nephrol Hypertens.* 2008;17(6):635-41.
9. Pannier B, Guerin AP, Marchais SJ, Safar ME, London GM. Stiffness of capacitive and conduit arteries: prognostic significance for end-stage renal disease patients. *Hypertension.* 2005;45(4):592-6.

- 1  
2  
3 10. Loutradis C, Schoina M, Dimitroulas T, Doumas M, Garyfallos A, Karagiannis A, et al.  
4  
5 Comparison of ambulatory central hemodynamics and arterial stiffness in patients with  
6  
7 diabetic and non-diabetic CKD. *J Clin Hypertens (Greenwich)*. 2020;22(12):2239-49.  
8  
9
- 10 11. Carlsen RK, Peters CD, Khatir DS, Laugesen E, Botker HE, Winther S, et al. Estimated aortic  
11  
12 blood pressure based on radial artery tonometry underestimates directly measured aortic blood  
13  
14 pressure in patients with advancing chronic kidney disease staging and increasing arterial  
15  
16 stiffness. *Kidney Int*. 2016;90(4):869-77.  
17  
18
- 19 12. Lin M, Chan GC, Chan KW, Lai KN, Tang SC. Vascular age is associated with the risk of  
20  
21 dialysis or death in chronic kidney disease. *Nephrology (Carlton)*. 2020;25(4):314-22.  
22  
23
- 24 13. Laurent S, Marais L, Boutouyrie P. The Noninvasive Assessment of Vascular Aging. *Can J*  
25  
26 *Cardiol*. 2016;32(5):669-79.  
27
- 28 14. Zanolli L, Empana JP, Perier MC, Alivon M, Ketthab H, Castellino P, et al. Increased carotid  
29  
30 stiffness and remodelling at early stages of chronic kidney disease. *J Hypertens*.  
31  
32 2019;37(6):1176-82.  
33  
34
- 35 15. Bonarjee VVS. Arterial Stiffness: A Prognostic Marker in Coronary Heart Disease. Available  
36  
37 *Methods and Clinical Application*. *Front Cardiovasc Med*. 2018;5:64.  
38  
39
- 40 16. Laurent S, Cockcroft J, Van Bortel L, Boutouyrie P, Giannattasio C, Hayoz D, et al. Expert  
41  
42 consensus document on arterial stiffness: methodological issues and clinical applications. *Eur*  
43  
44 *Heart J*. 2006;27(21):2588-605.  
45  
46
- 47 17. Beller EM, Glasziou PP, Altman DG, Hopewell S, Bastian H, Chalmers I, et al. PRISMA for  
48  
49 Abstracts: reporting systematic reviews in journal and conference abstracts. *PLoS Med*.  
50  
51 2013;10(4):e1001419.  
52  
53  
54  
55  
56  
57

- 1
- 2
- 3 18. Liberati A, Altman DG, Tetzlaff J, Mulrow C, Gotzsche PC, Ioannidis JP, et al. The PRISMA
- 4 statement for reporting systematic reviews and meta-analyses of studies that evaluate
- 5 healthcare interventions: explanation and elaboration. *BMJ*. 2009;339:b2700.
- 6
- 7
- 8
- 9
- 10 19. Egger M, Davey Smith G, Schneider M, Minder C. Bias in meta-analysis detected by a simple,
- 11 graphical test. *BMJ*. 1997;315(7109):629-34.
- 12
- 13
- 14 20. Guyatt GH, Oxman AD, Vist GE, Kunz R, Falck-Ytter Y, Alonso-Coello P, et al. GRADE: an
- 15 emerging consensus on rating quality of evidence and strength of recommendations. *BMJ*.
- 16 2008;336(7650):924-6.
- 17
- 18
- 19
- 20
- 21
- 22
- 23
- 24
- 25
- 26
- 27
- 28
- 29
- 30
- 31
- 32
- 33
- 34
- 35
- 36
- 37
- 38
- 39
- 40
- 41
- 42
- 43
- 44
- 45
- 46
- 47
- 48
- 49
- 50
- 51
- 52
- 53
- 54
- 55
- 56
- 57
- 58
- 59
- 60

### **Author statement**

All authors contributed towards the submitted final manuscript. CF is a kinesiologist specialised in chronic kidney disease and postdoctoral researcher. MA is a nephrologist, the lead supervisor and corresponding author. PB is co-supervisor. CF, HO and MP drafted the initial manuscript and received guidance on content, methodology and analysis from AS and MA. MP and CAG are first reviewers, CF and HO are second reviewers. All authors have read and agreed the final manuscript.

### **Funding**

This research received no specific grant from any funding agency in the public, commercial or not-for-profit sectors.

### **Conflicts of interests**

Competing interests: None to declare

### **Technical appendix, statistical code, and dataset available from the Dryad repository**

N/A

**Word Count:** 2877 words

## **Appendix 1. Comprehensive Search Strategy for MEDLINE**

### **Mesh terms:**

#### ➤ **Population:**

- a) Chronic Renal or Kidney Failure
- b) End Stage Renal or Kidney Disease

#### ➤ **Intervention**

- c) Renal Dialysis; renal, extracorporeal
- d) Hemodialysis
- e) Home Hemodialysis
- f) Hemodialysis Solutions, Dialysate

#### ➤ **Comparator**

No restriction

#### ➤ **Outcomes**

### **Metrics of arterial stiffness:**

- g) Vascular stiffness, arterial stiffness, stiffness, aortic stiffness, carotid stiffness, central artery stiffness, large artery stiffness
- h) Stiffness, peripheral, small artery, brachial, femoral
- i) Carotid-femoral pulse wave velocity, carotid-radial pulse wave velocity, femoral-distal pulse wave velocity, pulse transit time,
- j) Brachial-ankle pulse wave velocity
- k) Augmentation index, Pulse wave analysis, central pulse pressure, pressure waveforms
- l) Distensibility, elasticity,
- m)  $\beta$ -stiffness, CAVI

Database: PubMed from inception to 2020 October 14.

### Search Strategy (Intervention AND Outcomes)

- 1 Kidney Failure, Chronic/ (94 073)
- 2 Renal Failure ti.ab.(90 187)
- 3 Kidney Failure ti.ab. (8 750)

- 1
- 2
- 3 4 (#2 or #3) AND chronic ti.ab.(35 520)
- 4 5 Renal disease\* ti.ab.(66 784)
- 5 6 Kidney disease\* ti.ab (86 384)
- 6 7 (OR #2, #3, #5, #6) AND End-Stage ti.ab. (44 753)
- 8 8 ESKD ti.ab (1 262)
- 9 9 ESRD ti.ab (16 791)
- 10 10 (OR #1, #4, #7, #8, #9) (131 528)
- 11 11 Renal Dialysis/ (114 412)
- 12 12 Dialysis ti.ab.OR Dialyses ti.ab.(110 444)
- 13 13 Renal ti.ab. AND #12 (43 530)
- 14 14 Extracorporeal ti.ab. AND #12 (1 657)
- 15 15 Hemodialys\* ti.ab.OR haemodialys\* ti.ab. (78 417)
- 16 16 Hemodialysis Solutions/ (1 606)
- 17 17 Hemodialysis, Home/ (1 943)
- 18 18 Dialysate ti.ab. (10 831)
- 19 19 (OR #11, #13, #14, #15, #16, #17, #18) (154 493)
- 20 20 Vascular Stiffness/ (6 198)
- 21 21 Pulse Wave Analysis/ (4 305)
- 22 22 Carotid-Femoral Pulse Wave Velocity/ (27)
- 23 23 Elastic Modulus/ (10 317)
- 24 24 Vascular Capacitance/ (287)
- 25 25 Cardio Ankle Vascular Index/ (18)
- 26 26 Carotid Intima-Media Thickness/ (5 028)
- 27 27 Vascular ti.ab. AND Stiffness ti.ab. (6 881)
- 28 28 Arter\* ti.ab. AND Stiffness ti.ab. (13 560)
- 29 29 Aort\* ti.ab. AND Stiffness ti.ab. (5 547)
- 30 30 Pulse wave velocit\* ti.ab (9 442)
- 31 31 Pulse wave analys\* ti.ab (1 199)
- 32 32 Pulse wave transit time\* ti.ab (98)
- 33 33 PWV ti.ab. (4 722)
- 34 34 Pulse transit time\* ti.ab. (626)
- 35 35 Carotid femoral pulse wave velocit\* ti.ab. (1 576)
- 36 36 Carotid femoral PWV ti.ab. (316)
- 37 37 CfPWV ti.ab. (254)
- 38 38 Carotid radial pulse wave velocit\* ti.ab. (108)
- 39 39 Carotid radial PWV ti.ab. (78)
- 40 40 Cr PWV ti.ab. (27)
- 41 41 Carotid brachial pulse wave velocit\* ti.ab. (5)
- 42 42 Carotid brachial PWV ti.ab. (5)
- 43 43 Cb PWV ti.ab. (1)
- 44 44 Brachial ankle pulse wave velocit\* ti.ab. (1 439)
- 45 45 Brachial ankle PWV ti.ab. (200)
- 46 46 ba PWV ti.ab. (118)
- 47 47 (aorta ti.ab.OR aortic ti.ab.) AND pulse wave velocit\* ti.ab. (3 481)
- 48 48 (aorta ti.ab.OR aortic ti.ab.) AND PWV ti.ab. (1 850)
- 49 49 Ao PWV ti.ab.(9)
- 50 50 Femoral ankle pulse wave velocit\* ti.ab. (10)
- 51
- 52
- 53
- 54
- 55
- 56
- 57
- 58
- 59
- 60

- 1  
2  
3 51 Femoral ankle PWV ti.ab. (22)  
4 52 Augmentation index ti.ab. (2 998)  
5 53 AIx ti.ab. (1493)  
6 54 Central pulse pressure ti.ab. OR central PP ti.ab. (489)  
7 55 aortic pulse pressure ti.ab. OR aortic PP ti.ab. (301)  
8 56 Elastic modulus ti.ab. (9 499)  
9 57 (Young ti.ab. OR young's ti.ab.) AND modulus ti.ab. (8 810)  
10 58 Vascular capacitance ti.ab. (186)  
11 59 Cardio ankle vascular index ti.ab. (584)  
12 60 CAVI ti.ab. (654)  
13 61 distensibility ti.ab. (4 626)  
14 62 arterial elasticity ti.ab.(519)  
15 63 stiffness index ti.ab. OR  $\beta$  stiffness ti.ab. (1 597)  
16 64 (OR #20-#64) (53 637)  
17  
18  
19  
20 64 (#19 AND #64) (1 081)  
21  
22  
23  
24 65 AND humans[filter] (987)  
25  
26  
27  
28  
29  
30  
31  
32  
33  
34  
35  
36  
37  
38  
39  
40  
41  
42  
43  
44  
45  
46  
47  
48  
49  
50  
51  
52  
53  
54  
55  
56  
57  
58  
59  
60

# Reporting checklist for protocol of a systematic review.

Based on the PRISMA-P guidelines.

## Instructions to authors

Complete this checklist by entering the page numbers from your manuscript where readers will find each of the items listed below.

Your article may not currently address all the items on the checklist. Please modify your text to include the missing information. If you are certain that an item does not apply, please write "n/a" and provide a short explanation.

Upload your completed checklist as an extra file when you submit to a journal.

In your methods section, say that you used the PRISMA-Reporting guidelines, and cite them as:

Moher D, Shamseer L, Clarke M, Ghersi D, Liberati A, Petticrew M, Shekelle P, Stewart LA. Preferred Reporting Items for Systematic Review and Meta-Analysis Protocols (PRISMA-P) 2015 statement. Syst Rev. 2015;4(1):1.

|                |                     |                                                                                    | Page   |
|----------------|---------------------|------------------------------------------------------------------------------------|--------|
|                |                     | Reporting Item                                                                     | Number |
| <b>Title</b>   |                     |                                                                                    |        |
| Identification | <a href="#">#1a</a> | Identify the report as a protocol of a systematic review                           | 1      |
| Update         | <a href="#">#1b</a> | If the protocol is for an update of a previous systematic review, identify as such | N/A    |



1 **Registration**  
2  
3

4 [#2](#) If registered, provide the name of the registry (such as 2  
5  
6 PROSPERO) and registration number  
7  
8  
9

10 **Authors**  
11

12  
13 **Contact** [#3a](#) Provide name, institutional affiliation, e-mail address of all 1  
14  
15 protocol authors; provide physical mailing address of  
16  
17 corresponding author  
18  
19

20 **Contribution** [#3b](#) Describe contributions of protocol authors and identify the 17  
21  
22 guarantor of the review  
23  
24

25 **Amendments**  
26  
27

28  
29 [#4](#) If the protocol represents an amendment of a previously N/A  
30  
31 completed or published protocol, identify as such and list  
32  
33 changes; otherwise, state plan for documenting important  
34  
35 protocol amendments  
36  
37  
38

39 **Support**  
40

41  
42 **Sources** [#5a](#) Indicate sources of financial or other support for the review 17  
43  
44

45 **Sponsor** [#5b](#) Provide name for the review funder and / or sponsor N/A  
46  
47

48 **Role of sponsor or** [#5c](#) Describe roles of funder(s), sponsor(s), and / or N/A  
49  
50 funder  
51 institution(s), if any, in developing the protocol  
52

53 **Introduction**  
54  
55  
56  
57  
58  
59  
60

|    |                      |                      |                                                                 |       |
|----|----------------------|----------------------|-----------------------------------------------------------------|-------|
| 1  | Rationale            | <a href="#">#6</a>   | Describe the rationale for the review in the context of what is | 4-5   |
| 2  |                      |                      | already known                                                   |       |
| 3  |                      |                      |                                                                 |       |
| 4  |                      |                      |                                                                 |       |
| 5  |                      |                      |                                                                 |       |
| 6  | Objectives           | <a href="#">#7</a>   | Provide an explicit statement of the question(s) the review     | 5     |
| 7  |                      |                      | will address with reference to participants, interventions,     |       |
| 8  |                      |                      | comparators, and outcomes (PICO)                                |       |
| 9  |                      |                      |                                                                 |       |
| 10 |                      |                      |                                                                 |       |
| 11 |                      |                      |                                                                 |       |
| 12 |                      |                      |                                                                 |       |
| 13 |                      |                      |                                                                 |       |
| 14 | <b>Methods</b>       |                      |                                                                 |       |
| 15 |                      |                      |                                                                 |       |
| 16 |                      |                      |                                                                 |       |
| 17 | Eligibility criteria | <a href="#">#8</a>   | Specify the study characteristics (such as PICO, study          | 6,8   |
| 18 |                      |                      | design, setting, time frame) and report characteristics (such   |       |
| 19 |                      |                      | as years considered, language, publication status) to be        |       |
| 20 |                      |                      | used as criteria for eligibility for the review                 |       |
| 21 |                      |                      |                                                                 |       |
| 22 |                      |                      |                                                                 |       |
| 23 |                      |                      |                                                                 |       |
| 24 |                      |                      |                                                                 |       |
| 25 |                      |                      |                                                                 |       |
| 26 |                      |                      |                                                                 |       |
| 27 | Information          | <a href="#">#9</a>   | Describe all intended information sources (such as              | 7     |
| 28 |                      |                      | electronic databases, contact with study authors, trial         |       |
| 29 | sources              |                      | registers or other grey literature sources) with planned dates  |       |
| 30 |                      |                      | of coverage                                                     |       |
| 31 |                      |                      |                                                                 |       |
| 32 |                      |                      |                                                                 |       |
| 33 |                      |                      |                                                                 |       |
| 34 |                      |                      |                                                                 |       |
| 35 |                      |                      |                                                                 |       |
| 36 |                      |                      |                                                                 |       |
| 37 | Search strategy      | <a href="#">#10</a>  | Present draft of search strategy to be used for at least one    | 18-20 |
| 38 |                      |                      | electronic database, including planned limits, such that it     |       |
| 39 |                      |                      | could be repeated                                               |       |
| 40 |                      |                      |                                                                 |       |
| 41 |                      |                      |                                                                 |       |
| 42 |                      |                      |                                                                 |       |
| 43 |                      |                      |                                                                 |       |
| 44 |                      |                      |                                                                 |       |
| 45 | Study records -      | <a href="#">#11a</a> | Describe the mechanism(s) that will be used to manage           | 9     |
| 46 | data management      |                      | records and data throughout the review                          |       |
| 47 |                      |                      |                                                                 |       |
| 48 |                      |                      |                                                                 |       |
| 49 |                      |                      |                                                                 |       |
| 50 | Study records -      | <a href="#">#11b</a> | State the process that will be used for selecting studies       | 8-9   |
| 51 | selection process    |                      | (such as two independent reviewers) through each phase of       |       |
| 52 |                      |                      | the review (that is, screening, eligibility and inclusion in    |       |
| 53 |                      |                      | meta-analysis)                                                  |       |
| 54 |                      |                      |                                                                 |       |
| 55 |                      |                      |                                                                 |       |
| 56 |                      |                      |                                                                 |       |
| 57 |                      |                      |                                                                 |       |
| 58 |                      |                      |                                                                 |       |
| 59 |                      |                      |                                                                 |       |
| 60 |                      |                      |                                                                 |       |

|    |                    |                      |                                                                                 |       |
|----|--------------------|----------------------|---------------------------------------------------------------------------------|-------|
| 1  | Study records -    | <a href="#">#11c</a> | Describe planned method of extracting data from reports                         | 9     |
| 2  |                    |                      |                                                                                 |       |
| 3  | data collection    |                      | (such as piloting forms, done independently, in duplicate),                     |       |
| 4  |                    |                      |                                                                                 |       |
| 5  | process            |                      | any processes for obtaining and confirming data from                            |       |
| 6  |                    |                      |                                                                                 |       |
| 7  |                    |                      | investigators                                                                   |       |
| 8  |                    |                      |                                                                                 |       |
| 9  |                    |                      |                                                                                 |       |
| 10 |                    |                      |                                                                                 |       |
| 11 | Data items         | <a href="#">#12</a>  | List and define all variables for which data will be sought                     | 9     |
| 12 |                    |                      |                                                                                 |       |
| 13 |                    |                      | (such as PICO items, funding sources), any pre-planned                          |       |
| 14 |                    |                      |                                                                                 |       |
| 15 |                    |                      | data assumptions and simplifications                                            |       |
| 16 |                    |                      |                                                                                 |       |
| 17 |                    |                      |                                                                                 |       |
| 18 | Outcomes and       | <a href="#">#13</a>  | List and define all outcomes for which data will be sought,                     | 6-7   |
| 19 |                    |                      |                                                                                 |       |
| 20 | prioritization     |                      | including prioritization of main and additional outcomes, with                  |       |
| 21 |                    |                      |                                                                                 |       |
| 22 |                    |                      | rationale                                                                       |       |
| 23 |                    |                      |                                                                                 |       |
| 24 |                    |                      |                                                                                 |       |
| 25 |                    |                      |                                                                                 |       |
| 26 | Risk of bias in    | <a href="#">#14</a>  | Describe anticipated methods for assessing risk of bias of                      | 10    |
| 27 |                    |                      |                                                                                 |       |
| 28 | individual studies |                      | individual studies, including whether this will be done at the                  |       |
| 29 |                    |                      |                                                                                 |       |
| 30 |                    |                      | outcome or study level, or both; state how this information                     |       |
| 31 |                    |                      |                                                                                 |       |
| 32 |                    |                      | will be used in data synthesis                                                  |       |
| 33 |                    |                      |                                                                                 |       |
| 34 |                    |                      |                                                                                 |       |
| 35 |                    |                      |                                                                                 |       |
| 36 | Data synthesis     | <a href="#">#15a</a> | Describe criteria under which study data will be                                | 10-11 |
| 37 |                    |                      |                                                                                 |       |
| 38 |                    |                      | quantitatively synthesised                                                      |       |
| 39 |                    |                      |                                                                                 |       |
| 40 |                    |                      |                                                                                 |       |
| 41 | Data synthesis     | <a href="#">#15b</a> | If data are appropriate for quantitative synthesis, describe                    | 10-11 |
| 42 |                    |                      |                                                                                 |       |
| 43 |                    |                      | planned summary measures, methods of handling data and                          |       |
| 44 |                    |                      |                                                                                 |       |
| 45 |                    |                      | methods of combining data from studies, including any                           |       |
| 46 |                    |                      |                                                                                 |       |
| 47 |                    |                      | planned exploration of consistency (such as I <sup>2</sup> , Kendall's $\tau$ ) |       |
| 48 |                    |                      |                                                                                 |       |
| 49 |                    |                      |                                                                                 |       |
| 50 |                    |                      |                                                                                 |       |
| 51 | Data synthesis     | <a href="#">#15c</a> | Describe any proposed additional analyses (such as                              | 10-12 |
| 52 |                    |                      |                                                                                 |       |
| 53 |                    |                      | sensitivity or subgroup analyses, meta-regression)                              |       |
| 54 |                    |                      |                                                                                 |       |
| 55 |                    |                      |                                                                                 |       |
| 56 |                    |                      |                                                                                 |       |
| 57 |                    |                      |                                                                                 |       |
| 58 |                    |                      |                                                                                 |       |
| 59 |                    |                      |                                                                                 |       |
| 60 |                    |                      |                                                                                 |       |

|    |                |                      |                                                                 |    |
|----|----------------|----------------------|-----------------------------------------------------------------|----|
| 1  | Data synthesis | <a href="#">#15d</a> | If quantitative synthesis is not appropriate, describe the type | 11 |
| 2  |                |                      | of summary planned                                              |    |
| 3  |                |                      |                                                                 |    |
| 4  |                |                      |                                                                 |    |
| 5  |                |                      |                                                                 |    |
| 6  | Meta-bias(es)  | <a href="#">#16</a>  | Specify any planned assessment of meta-bias(es) (such as        | 12 |
| 7  |                |                      | publication bias across studies, selective reporting within     |    |
| 8  |                |                      | studies)                                                        |    |
| 9  |                |                      |                                                                 |    |
| 10 |                |                      |                                                                 |    |
| 11 |                |                      |                                                                 |    |
| 12 |                |                      |                                                                 |    |
| 13 |                |                      |                                                                 |    |
| 14 | Confidence in  | <a href="#">#17</a>  | Describe how the strength of the body of evidence will be       | 12 |
| 15 | cumulative     |                      | assessed (such as GRADE)                                        |    |
| 16 | evidence       |                      |                                                                 |    |
| 17 |                |                      |                                                                 |    |
| 18 |                |                      |                                                                 |    |
| 19 |                |                      |                                                                 |    |
| 20 |                |                      |                                                                 |    |
| 21 |                |                      |                                                                 |    |

22 None The PRISMA-P checklist is distributed under the terms of the Creative Commons Attribution  
23 License CC-BY 4.0. This checklist can be completed online using <https://www.goodreports.org/>, a tool  
24 made by the [EQUATOR Network](#) in collaboration with [Penelope.ai](#)  
25  
26  
27  
28  
29  
30  
31  
32  
33  
34  
35  
36  
37  
38  
39  
40  
41  
42  
43  
44  
45  
46  
47  
48  
49  
50  
51  
52  
53  
54  
55  
56  
57  
58  
59  
60
